# Supplementary material
Source: PubMed Central journal article supplement (PMC4056935)
Supplement: ml300407y_si_001.pdf [file ml300407y_si_001.pdf]

# Structure-Based Optimization of a HIV-1 Entry Inhibitor Exploiting X-Ray and Thermodynamic Characterization.

Judith M. LaLonde<sup>\*a</sup>, Matthew Le-Khac<sup>b,c,†</sup>, David M. Jones<sup>d,†</sup>, Joel R. Courter<sup>d,†</sup>, Jongwoo Park<sup>d</sup>, Arne Schön<sup>c</sup>, Amy M. Princiotto<sup>f</sup>, Xueling Wu<sup>g</sup>, John R. Mascola<sup>g</sup>, Ernesto Freire<sup>c</sup>, Joseph Sodroski<sup>f,h</sup>, Navid Madani<sup>f</sup>, Wayne A. Hendrickson<sup>\*c,i</sup>, Amos B. Smith, III<sup>\*d</sup>

<sup>a</sup>Department of Chemistry, Bryn Mawr College, Bryn Mawr, PA 19010; <sup>b</sup>Department of Pharmacology and <sup>c</sup>Department of Biochemistry and Molecular Biophysics, Columbia University, New York, NY 10032; <sup>d</sup>Department of Chemistry, University of Pennsylvania, Philadelphia, PA 19104; <sup>e</sup>Department of Biology, The Johns Hopkins University, Baltimore, MD 21218; <sup>f</sup>Department of Cancer Immunology and AIDS, Dana-Farber Cancer Institute, Harvard Medical School, 450 Brookline Ave., Boston, MA 02115; <sup>g</sup>Vaccine Research Center, National Institute of Allergy and Infectious Diseases, Bethesda MD 20892; <sup>h</sup>Department of Microbiology and Immunology, Harvard Medical School; Department of Immunology and Infectious Diseases, Harvard School of Public Health; Ragon Institute of MGH, MIT and Harvard, Boston, MA 02115; <sup>i</sup>Department of Physiology and Cellular Biophysics, Columbia University, New York, NY 10032.

---

## Supporting Information Table of Contents

---

|                                                                                                                                |    |
|--------------------------------------------------------------------------------------------------------------------------------|----|
| Table S1. Summary of Crystallographic Data .....                                                                               | 2  |
| Figure S1. X-ray crystal structure and electron density of (±)- <b>4</b> and (+)- <b>4</b> bound in Phe43 pocket of gp120..... | 3  |
| Table S2. HIV-1 neutralization activity of (+)- <b>4</b> , in comparison to (+)- <b>3</b> and <b>1</b> .....                   | 4  |
| Figure S2. Comparison of four structures of ( <i>R,R</i> )- <b>4</b> /(+)- <b>4</b> in complexes with gp120.....               | 5  |
| Table S3. Ligand RMSDs .....                                                                                                   | 6  |
| Experimental Methods.....                                                                                                      | 7  |
| Figure S2. Comparison of experimental and simulated titrations for (–)- <b>4</b> with gp120.....                               | 8  |
| References.....                                                                                                                | 21 |

**Table S1. Summary of Crystallographic Data**

| gp120 clade                              | ( <i>R,R</i> )-4<br>DMJ-II-121<br>(racemic)<br>Clade C <sub>1086</sub> | (+)-4<br>DMJ-II-121<br>Clade A/E <sub>93TH057</sub> |
|------------------------------------------|------------------------------------------------------------------------|-----------------------------------------------------|
| Data Collection                          |                                                                        |                                                     |
| Space Group                              | C222 <sub>1</sub>                                                      | P2 <sub>1</sub>                                     |
| a, b, c (Å)                              | 67.45, 127.7, 192.9                                                    | 65.32, 68.78, 94.44                                 |
| $\alpha$ , $\beta$ , $\gamma$ (deg)      | 90.00, 90.00, 90.00                                                    | 90.00, 90.89, 90.00                                 |
| Resolution (Å)                           | 2.50 – 38.6 (2.56-<br>2.50)                                            | 2.21 – 94.4 (2.32 –<br>2.21)                        |
| R <sub>Merge</sub>                       | 0.082 (0.833)                                                          | 0.120 (0.371)                                       |
| Completeness (%)                         | 99.9 (100)                                                             | 94.9 (74.5)                                         |
| I/ $\sigma$                              | 22.7 (3.8)                                                             | 9.0 (2.6)                                           |
| Redundancy                               | 8.2 (8.3)                                                              | 1.84 (1.43)                                         |
| # of unique reflections                  | 29249 (2108)                                                           | 40186 (4499)                                        |
| Refinement                               |                                                                        |                                                     |
| Resolution (Å)                           | 2.50 – 29.8                                                            | 2.50 – 33.63                                        |
| R <sub>work</sub> /R <sub>free</sub> (%) | 25.38/27.47                                                            | 19.57/26.14                                         |
| # of Atoms                               |                                                                        |                                                     |
| Ligands                                  | 241                                                                    | 310                                                 |
| Water                                    | 259                                                                    | 25                                                  |
| Protein                                  | 5270                                                                   | 5341                                                |
| B-Factors                                |                                                                        |                                                     |
| Ligand                                   | 50.7                                                                   | 65.4                                                |
| Water                                    | 29.2                                                                   | 47.7                                                |
| Protein                                  | 40.8                                                                   | 59.4                                                |
| RMSD                                     |                                                                        |                                                     |
| Bond length (Å)                          | 0.053                                                                  | 0.009                                               |
| Bond angle (deg.)                        | 1.308                                                                  | 1.222                                               |
| PDB entry                                | 4I53                                                                   | 4I54                                                |

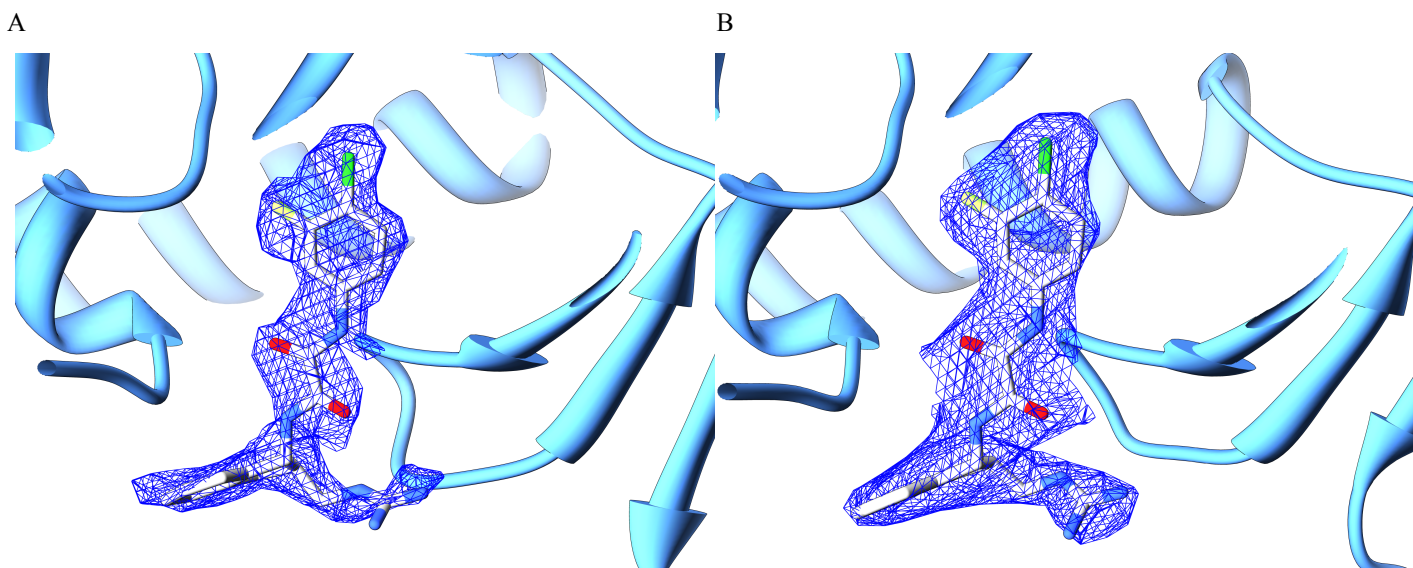

**Figure S1.** X-ray crystal structure of *(R,R)*-**4** and single enantiomer *(+)*-**4** bound in Phe43 pocket of clade C and clade A/E gp120, respectively. A)  $2F_o - F_c$  electron density at 2.5 Å encompassing *(R,R)*-**4**:clade C bound to the Phe43 pocket of gp120 clade C1086. The *(R,R)*-**4** structure was obtained from a racemic sample of  $(\pm)$ -**4** and only *(R,R)*-enantiomer was observed bound to gp120 clade C1086. B)  $2F_o - F_c$  electron density at 2.5 Å encompassing *(+)*-**4** bound to the Phe43 pocket of gp120 clade A/E93TH057. The densities are contoured to  $1\sigma$  and represented as blue mesh in both. Coloring for non-carbon atoms: red = oxygen; dark blue = nitrogen; yellow = fluorine; green = chlorine. All sections display gp120 in blue and *(R,R)*-**4**/*(+)*-**4** in light grey.

**Table S2. HIV-1 neutralization activity of (+)-4, in comparison to (+)-3 and 1.**

|                        | Viral strain     | IC <sub>50</sub> (μM) |                    |                    | IC <sub>80</sub> (μM) |                    |                   |
|------------------------|------------------|-----------------------|--------------------|--------------------|-----------------------|--------------------|-------------------|
|                        |                  | (+)-4                 | (+)-3              | 1                  | (+)-4                 | (+)-3              | 1                 |
| clade B (n=25)         | HXB2             | 0.333                 | 1.2                | 5.7                | 0.875                 | 4.7                | 21.0              |
|                        | MN.3             | 1.6                   | 1.8                | 19.6               | 13.0                  | 27.1               | >33               |
|                        | BaL.01           | 1.2                   | 3.6                | >33                | 4.0                   | 21.2               | >33               |
|                        | BaL.26           | 1.5                   | 2.2                | 28.5               | 5.0                   | 24.2               | >33               |
|                        | ADA              | 0.574                 | 2.2                | 12.1               | 3.4                   | 8.8                | >33               |
|                        | SF162            | 1.1                   | 3.6                | 14.1               | 2.8                   | 11.8               | >33               |
|                        | SS1196.1         | 0.256                 | 0.919              | 7.1                | 0.851                 | 3.4                | 23.9              |
|                        | YU2              | 4.8                   | 15.5               | >33                | 11.7                  | >33                | >33               |
|                        | 89.6             | 0.785                 | 2.8                | 10.9               | 2.1                   | 8.1                | 30.9              |
|                        | THRO.18          | 3.6                   | 10.6               | >33                | 15.1                  | 32.0               | >33               |
|                        | REJO.67          | 0.456                 | 0.634              | 5.0                | 3.2                   | 9.5                | >33               |
|                        | JR-FL            | 26.7                  | >33                | >33                | >33                   | >33                | >33               |
|                        | QH0692.42        | 0.764                 | 2.4                | 21.7               | 2.8                   | 8.9                | >33               |
|                        | 6535.3           | 1.0                   | 2.8                | 15.9               | 2.3                   | 6.9                | >33               |
|                        | RHPA.7           | 11.1                  | 13.8               | >33                | >33                   | >33                | >33               |
|                        | 7165.18          | 0.495                 | 0.462              | 6.1                | 1.4                   | 1.5                | 28.5              |
|                        | 6101.10          | 0.980                 | 1.8                | 8.1                | 1.6                   | 3.2                | 14.6              |
|                        | PVO.4            | 2.8                   | 4.9                | >33                | 9.8                   | 33.0               | >33               |
|                        | WITO.33          | 1.2                   | 2.3                | 21.7               | 3.9                   | 11.7               | >33               |
|                        | SC422.8          | 1.6                   | 1.8                | 23.1               | 8.5                   | 13.9               | >33               |
|                        | TRJO.58          | 25.0                  | >33                | >33                | >33                   | >33                | >33               |
|                        | CAAN.A2          | 1.0                   | 1.1                | 5.9                | 2.4                   | 2.8                | 20.2              |
|                        | BG1168.1         | 1.1                   | 2.4                | 13.7               | 2.4                   | 6.0                | >33               |
|                        | AC10.29          | 2.3                   | 2.5                | >33                | 11.3                  | 19.3               | >33               |
|                        | TRO.11           | 10.4                  | 14.8               | >33                | >33                   | >33                | >33               |
| <b>Breadth n=25</b>    |                  | <b>25/25 (100%)</b>   | <b>23/25 (92%)</b> | <b>16/25 (64%)</b> | <b>21/25 (84%)</b>    | <b>20/25 (80%)</b> | <b>6/25 (24%)</b> |
| <b>Geometric mean*</b> |                  | <b>1.7</b>            | <b>2.7</b>         | <b>11.8</b>        | <b>3.7</b>            | <b>9.4</b>         | <b>22.5</b>       |
| clade C (n=17)         | MW965.26         | 20.8                  | 21.3               | 33.0               | >33                   | >33                | >33               |
|                        | ZM109.4          | 21.2                  | 20.1               | >33                | >33                   | >33                | >33               |
|                        | Du123.6          | 26.6                  | 19.3               | >33                | >33                   | >33                | >33               |
|                        | Du172.17         | >33                   | >33                | >33                | >33                   | >33                | >33               |
|                        | Du151.2          | >33                   | >33                | >33                | >33                   | >33                | >33               |
|                        | CAP210.E8        | 17.6                  | 27.0               | >33                | >33                   | >33                | >33               |
|                        | ZM233.6          | 5.3                   | 18.2               | >33                | 13.8                  | >33                | >33               |
|                        | CAP244.D3        | >33                   | 27.6               | >33                | >33                   | >33                | >33               |
|                        | ZM197.7          | 10.0                  | 15.9               | >33                | 19.3                  | 31.1               | >33               |
|                        | ZM53.12          | >33                   | 31.2               | >33                | >33                   | >33                | >33               |
|                        | ZM214.15         | 2.4                   | 1.2                | 30.6               | 20.8                  | 19.9               | >33               |
|                        | ZM135.10a        | 12.6                  | 9.2                | >33                | 32.2                  | >33                | >33               |
|                        | ZM249.1          | >33                   | >33                | >33                | >33                   | >33                | >33               |
|                        | Du422.1          | 26.3                  | 25.9               | >33                | >33                   | >33                | >33               |
|                        | Du156.12         | >33                   | 33.0               | >33                | >33                   | >33                | >33               |
|                        | ZM106.9          | 32.8                  | 28.2               | >33                | >33                   | >33                | >33               |
|                        | CAP45.G3         | >33                   | 28.0               | >33                | >33                   | >33                | >33               |
| <b>Breadth n=17</b>    |                  | <b>10/17 (59%)</b>    | <b>14/17 (82%)</b> | <b>2/17 (12%)</b>  | <b>4/17 (24%)</b>     | <b>2/17 (12%)</b>  | <b>0/17 (0%)</b>  |
| <b>Geometric mean*</b> |                  | <b>14.0</b>           | <b>18.2</b>        | <b>31.8</b>        | <b>20.6</b>           | <b>24.9</b>        | <b>&gt;33</b>     |
| <b>SIV</b>             | <b>SIVmac251</b> | >33                   | >33                | >33                | >33                   | >33                | >33               |
| <b>control</b>         | <b>MuLV</b>      | >33                   | >33                | >33                | >33                   | >33                | >33               |

\*The geometric mean was calculated only for viral strains with an IC<sub>50</sub> or IC<sub>80</sub> values < 33 μM.

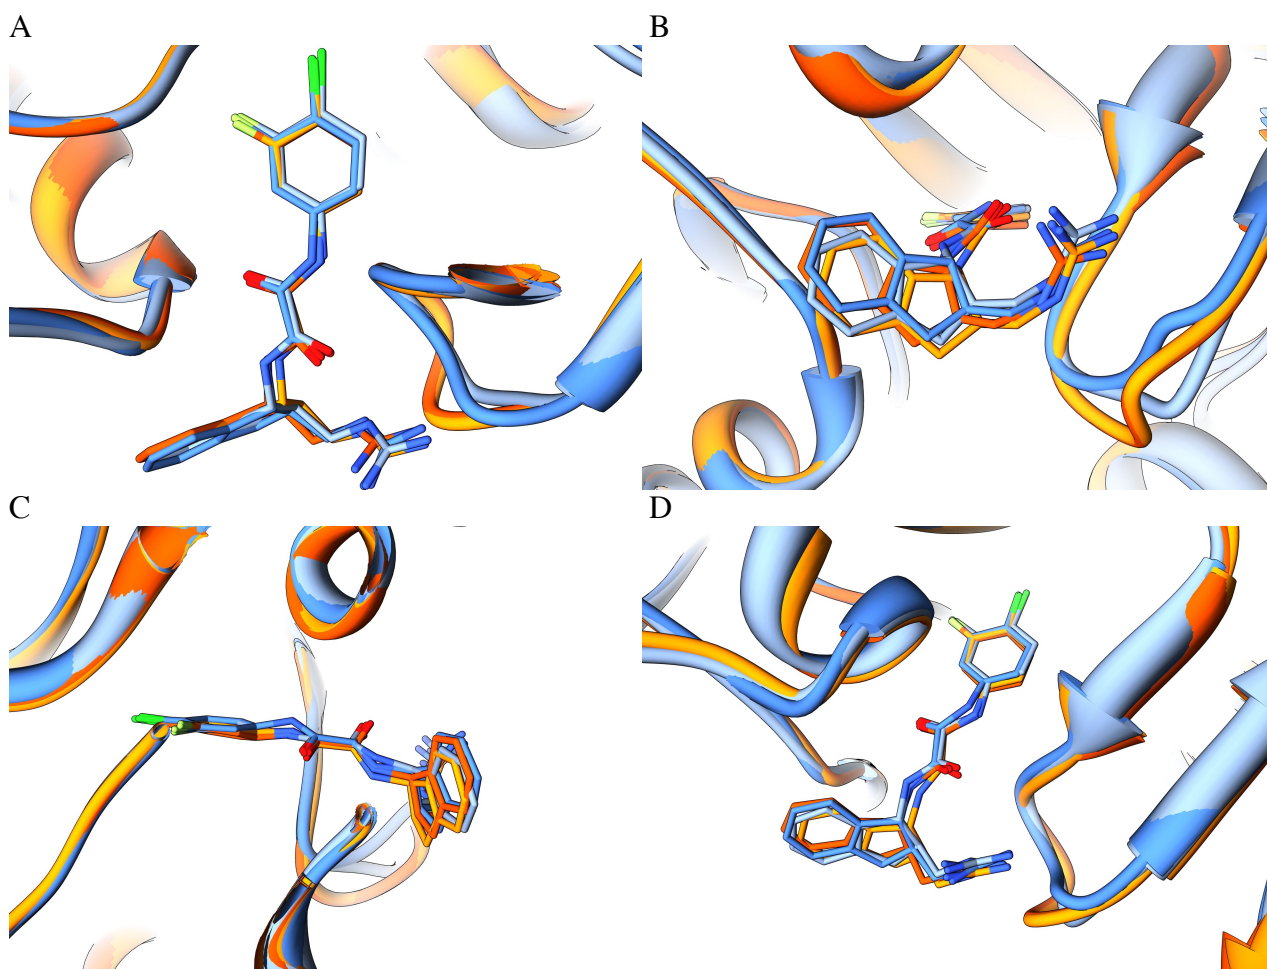

**Figure S2.** Comparison of four structures of  $(R,R)$ -4/(+)-4 in complexes with gp120. Two copies are of the  $(R,R)$ -4 enantiomer obtained from soaking the racemic sample  $(\pm)$ -4 into a crystal of a clade C gp120, and two copies are from the co-crystallization of (+)-4 with a clade A/E gp120. Copy A of  $(R,R)$ -4:clade C is in light orange and Copy B is in dark orange, and only  $(R,R)$ -enantiomer was observed bound to gp120 clade C1086. Copy A of (+)-4:clade A/E is in blue while copy B is in light blue. All structures are superimposed using the unliganded clade A/E93TH057 gp120 structure as a reference (PDB ID:3TGT).<sup>1</sup> A) The orientation is approximately the same as seen in Figure 1B. B) The orientation is a  $-90^\circ$  rotation on the X-axis compared to Figure S2.A. C) The orientation is a  $-90^\circ$  rotation on the y-axis compared to Figure S2.B. D) The orientation is arbitrary. Non-carbon atom coloring: red = oxygen; dark blue = nitrogen; yellow = fluorine; green = chlorine.

**Table S3.** RMSD Between Small Molecule Ligands in the A and B Molecules of the Asymmetric Unit

| Compound<br>RMSD (Å) | ( <i>R,R</i> )-4 A:clade C | (±)-4 B:clade C | (+)-4 A:clade A/E | (+)-4 B:clade A/E |
|----------------------|----------------------------|-----------------|-------------------|-------------------|
| (±)-4 A:clade C      |                            | 0.502           | 0.461             | 0.402             |
| (±)-4 B:clade C      | 0.502                      |                 | 0.414             | 0.599             |
| (+)-4 A:clade A/E    | 0.461                      | 0.414           |                   | 0.437             |
| (+)-4 B:clade A/E    | 0.402                      | 0.599           | 0.437             |                   |

## Experimental Methods

### *Cell-Based Infectivity Assays: General Considerations*

Compounds were dissolved in dimethyl sulfoxide (DMSO) and stored at 10 mM at  $-20^{\circ}\text{C}$ . The compounds were diluted in Dulbecco's modified Eagle medium (DMEM, Invitrogen) to create 1 mM solutions before use. Soluble CD4 (sCD4) was purchased from ImmunoDiagnostics (Woburn, MA). Human 293T embryonic kidney and canine Cf2Th thymocytes (ATCC) were grown at  $37^{\circ}\text{C}$  and 5%  $\text{CO}_2$  in DMEM (Invitrogen) containing 10% fetal bovine serum (Sigma) and 100  $\mu\text{g}/\text{mL}$  penicillin–streptomycin (Mediatech, Inc.). Cf2Th cells stably expressing human CD4 and either CCR5 or CXCR4,<sup>2,3</sup> were grown in medium supplemented with 0.4 mg/mL G418 (Invitrogen) and 0.20 mg/mL hygromycin B (Roche Diagnostics). By use of the Effectene transfection reagent (Qiagen), 293T human embryonic kidney cells were co-transfected with plasmids expressing the pCMV $\Delta$ P1 $\Delta$ envpA HIV-1 Gag-Pol packaging construct, the wild-type or mutant HIV-1YU2 envelope glycoproteins or the envelope glycoproteins of the control amphotropic murine leukemia virus (A-MLV), and the firefly luciferase-expressing vector at a DNA ratio of 1:1:3  $\mu\text{g}$ . For the production of viruses pseudotyped with the A-MLV glycoprotein, a rev-expressing plasmid was added. The single-round, replication-defective viruses in the supernatants were harvested 24–30 h after transfection, filtered (0.45  $\mu\text{m}$ ), aliquoted, and frozen at  $-80^{\circ}\text{C}$  until further use. The reverse transcriptase (RT) activities of all viruses were measured as described previously.<sup>4</sup>

### *Assay of Virus Infectivity and Inhibitor Sensitivity*

All compounds were assayed in triplicate, and the data are reported as the mean with standard deviation. The compound concentrations that inhibited 50% of virus infection ( $\text{IC}_{50}$ ) were determined by infecting Cf2Th-CD4/CCR5 cells with 10 000 RT units of wild-type HIV-1YU2 virus expressing luciferase with increasing concentrations of the compound. Cf2Th/CD4-CCR5 or Cf2Th/CD4-CXCR4 target cells were seeded at a density of  $6 \times 10^3$  cells/well in 96-well luminometer-compatible tissue culture plates (Perkin-Elmer) 24 h before infection. On the day of infection, 1–100  $\mu\text{M}$  was added to recombinant viruses (10 000 reverse transcriptase units) in a final volume of 50  $\mu\text{L}$  and incubated at  $37^{\circ}\text{C}$  for 30 min. The medium was removed from the target cells, which were then incubated with the virus–drug mixture for 2–4 h at  $37^{\circ}\text{C}$ . At the end of this time point, complete medium was added to a final volume of 150  $\mu\text{L}$  and incubated for 48 h at  $37^{\circ}\text{C}$ . The medium was removed from each well, and the cells were lysed with 30  $\mu\text{L}$  of passive lysis buffer (Promega) by three freeze–thaw cycles. An EG&G Berthold microplate luminometer LB 96V was used to measure luciferase activity in each well after the addition of 100  $\mu\text{L}$  of luciferin buffer (15 mM  $\text{MgSO}_4$ , 15 mM potassium phosphate buffer [pH 7.8], 1 mM ATP, 1 mM dithiothreitol) and 50  $\mu\text{L}$  of 1 mM D-luciferin potassium salt (BD Pharmingen). The compound concentrations that inhibited 50% of virus infection ( $\text{IC}_{50}$ ) when assayed against viruses with the amphotropic murine leukemia virus (A-MLV) envelope glycoproteins. Activation of viral infectivity was determined by infecting Cf2Th-CCR5 cells with recombinant HIV-1 YU2 in the presence of the compounds. The luciferase activity in the target cells incubated with each compound was divided by that in the cells incubated with 2 (Table 1) to obtain the relative activation of infectivity.

### *Viral Stocks and Neutralization Assays*

HIV-1 Env-pseudoviruses were prepared by transfecting 293T cells with 10  $\mu\text{g}$  of rev/env expression plasmid and 30  $\mu\text{g}$  of an env-deficient HIV-1 backbone vector (pSG3 $\Delta$ env), using Fugene 6 transfection reagents (Invitrogen). Pseudovirus-containing culture supernatants were harvested two days after transfection, filtered (0.45  $\mu\text{m}$ ), and stored at  $-80^{\circ}\text{C}$  or in the vapor phase of liquid nitrogen. Neutralization was measured using HIV-1 Env-pseudoviruses to infect TZM-bl cells as described previously.<sup>5–8</sup> Briefly, the test compounds ((+)-4, (+)-3 and 1) were diluted in complete media containing 10% DMSO. Then 40  $\mu\text{L}$  of virus was added to 10  $\mu\text{L}$  of serially diluted test reagent in duplicate wells of a 96-well flat bottom culture plate, and the virus–reagent mix was incubated for 30 min at  $37^{\circ}\text{C}$ . To keep assay conditions constant, sham media containing 10% DMSO was used in place of test reagent in specified control wells. The virus input was set at a multiplicity of infection of approximately 0.01–0.1, which generally results in 100,000 to 400,000 relative light units (RLU) in a luciferase assay (Promega, Madison, WI). The test compound concentrations were defined at the point of incubation with virus supernatant. Because DMJ-II-121 at the concentration of 100  $\mu\text{M}$  demonstrated apparent cytotoxicity to TZM-bl used in this assay, the highest concentration tested was 33  $\mu\text{M}$  for all of the compounds. Neutralization curves were fit by nonlinear regression using a 5-parameter hill slope equation as previously described.<sup>7,8</sup> The 50% or 80% inhibitory concentrations ( $\text{IC}_{50}$  or  $\text{IC}_{80}$ ) were reported as the reagent concentrations required to inhibit infection by 50% or 80%.

### *Isothermal Titration Calorimetry*

Isothermal titration calorimetry (ITC) was carried out using a VP-ITC microcalorimeter from MicroCal/GE Healthcare (Northampton, MA, USA). The purification protocol utilizing a monoclonal antibody that recognizes a non-linear epitope allowed for 100% functional gp120.<sup>9</sup> In all titration experiments, the gp120 and the different inhibitors were equilibrated with PBS, pH 7.4, with 2% DMSO. The titrations were performed three times at  $25^{\circ}\text{C}$  by injecting 10  $\mu\text{L}$  aliquots of inhibitor solution into the calorimetric cell (volume  $\sim 1.4$  mL) containing gp120 at a concentration of 2  $\mu\text{M}$ . The inhibitor concentration was 60–80  $\mu\text{M}$  was added in aliquots of 10  $\mu\text{L}$  until saturation was reached (usually in 20–30 injections). The heat evolved upon each injection of inhibitor was obtained from the integral of the calorimetric signal. Based on comparisons with the binding of CD4 to gp120<sup>10</sup> the compounds described in this paper bind with a true stoichiometry of 1:1. The experimental n value obtained from non-linear regression of the data was  $1.0 \pm 0.05$  for (+)-4 and (+)-5. The value for n was locked in the fitting of the datasets for the binding of (–)-4 and (–)-5 due to the much weaker binding affinity. Analysis of weaker binders needs to consider not only the c value but also the magnitude of the heat associated with binding as discussed in Freire et al.<sup>19</sup> In addition, ITC data for (–)-4 were simulated with the same derived parameters. The simulated curves were fitted following the same procedures used with the experimental data in order to confirm the uniqueness of the non-linear least squares solution (Figure S3). The heat associated with binding to gp120 in the cell was obtained by subtracting the

heat of dilution from the heat of reaction. The individual heats were plotted against the molar ratio, and the enthalpy change ( $\Delta H$ ) and association constant ( $K_a = 1/K_d$ ) were obtained by nonlinear regression of the data. The change in Gibbs energy ( $\Delta G$ ) was calculated from the affinity according to the relation  $\Delta G = -RT \ln K_a$ , where  $K_a$  is the association constant,  $R$  is the gas constant (1.987 cal/(K·mol)), and  $T$  is the absolute temperature in kelvin.  $T\Delta S$  was calculated from the relation  $\Delta G = \Delta H - T\Delta S$ .

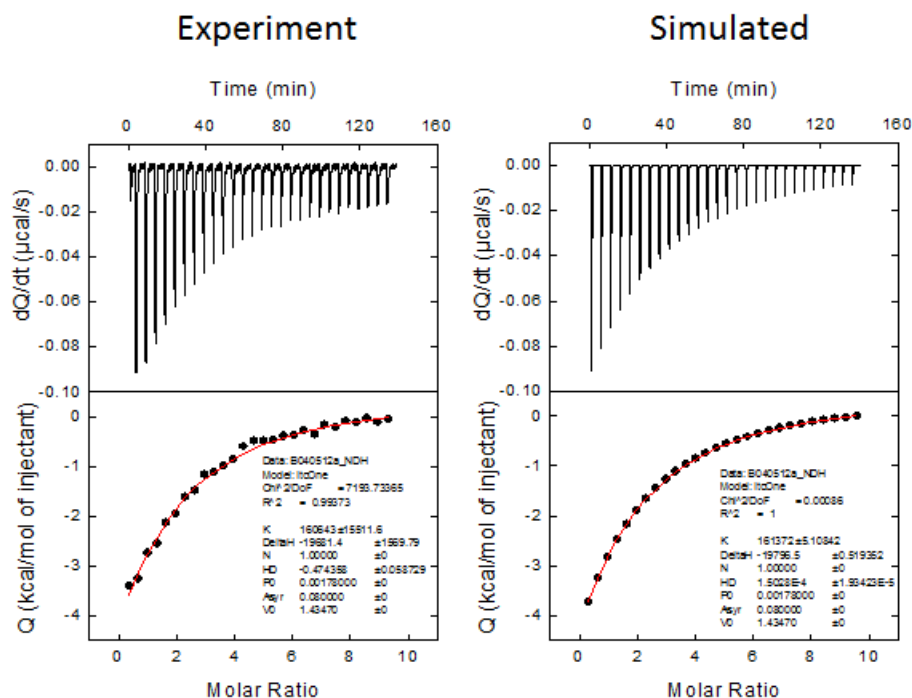

**Figure S3. Comparison of the experimental and simulated titrations of gp120 with (-)-4.** The left panel shows the experimental titration of gp120 with (-)-4. The respective values for the enthalpy change and dissociations constant of -19.7 kcal/mol and 6.2  $\mu$ M obtained from the non-linear fit of the experimental data were used together with the exact values for the injection and cell volumes and concentrations of the reactants in the simulation of the data shown in the right panel. The accuracy of the parameters obtained from the experimental data is demonstrated by the nonlinear fit of the simulated heats versus molar ratio data that gives a unique solution with values for the dissociation constant and enthalpy change of 6.2  $\mu$ M and -19.8 kcal/mol, respectively.

### Modeling

Small molecules were constructed in MOE V2011.1<sup>11</sup> and ionized using MOE's WashMDB function, and hydrogens were added. The small molecule conformation was minimized to a gradient of 0.01 with the MMFF94x<sup>12, 13</sup> using a distance-dependent dielectric constant of 1. The coordinates of (+)-3 bound to HIV-1 clade A/E gp120(H375S) core were used for modeling studies (PDBID: 4DKQ).<sup>8</sup> The protonate 3D utility in MOE was used to add hydrogen atoms to water and proteins atoms and to determine the tautomeric states and orientation of Asn, Gln, and His. The PFROSS1<sup>14</sup> (force field as implemented MOE was employed to minimize heavy atoms within an 8 Å shell around the ligand to an rms gradient of 0.01 applying a forcefield constraint of 10. GOLD (version 5.0.1)<sup>15, 16</sup> was used for docking, and the binding site was defined by using the crystallographic position of (+)-3. One-hundred genetic algorithm (GA) docking runs were performed with the following parameters: initial\_virtual\_pt\_match\_max=3.5, diverse\_solutions=1, divsol\_cluster\_size=1, and divsol\_rmsd=1.5. All other parameters were set to defaults. constant ( $K_a = 1/K_d$ ) were obtained by nonlinear regression of the data.

### Protein Purification and X-ray Crystallography

Plasmids for gp120 clade C1086 and clade A/E93TH057 H375S were donated by Young Do Kwon of the Peter Kwong Lab (National Institute of Health) as well as the method for crystallization. The plasmids were transiently transfected in HEK293 GNTT cells and expressed in the supernatant. The supernatant was passed through a 17b-conjugated column of protein A resin, washed with PBS and eluted with IgG elution buffer (Pierce). Endoglycosidase H was used to deglycosylated the 17b column purified gp120 followed by purification with a Con-A column and a Superdex 200 column (GE Healthcare). The purified deglycosylated gp120 was concentrated to 10-15 mg/ml.

Clade C1086 gp120 unliganded crystals were preformed using 18-20% (w/v) PEG 1500, 0.1 M CaCl<sub>2</sub>, 0.1 M imidazole pH 6.5. 0.5  $\mu$ l of the reservoir solution was mixed with 0.5  $\mu$ l of purified Clade C1086 gp120 and grown at 20°C. The compound of interest was dissolved in 100% DMSO. For each experiment, a single crystal was picked from the mother liquor and soaked in 5  $\mu$ l of a stabilization buffer—similar to the mother liquor but with a higher concentration of PEG 1500 (26%) and 200  $\mu$ M of the compound of interest. Crystals soaked in the compound of interest for 30-60 mins. Diffraction data for clade C1086 crystals were collected at X4C beamline



at Brookhaven National Laboratory. Clade A/E93TH057 H375S gp120 crystals were co-crystallized with the compound of interest at concentration of 500  $\mu$ M in 12% PEG 8000 (w/v), 5% isopropanol, 0.1 M HEPES pH 7.5. The clade A/E gp120 co-crystals were shot at Argonne National Light Source on 24ID-E beamline. Crystal structures were solved by molecular replacement module in PHENIX using unliganded clade A/E gp120 (PDB ID:3TGT)<sup>1</sup> and clade C1086 gp120 (PDB ID:3TGR)<sup>1</sup> as search models.

## Small Molecule Synthesis

### General Information

All reactions were conducted in oven-dried glassware under an inert atmosphere of nitrogen or argon, unless otherwise stated. All solvents were reagent or high performance liquid chromatography (HPLC) grade. Anhydrous  $\text{CH}_2\text{Cl}_2$  and THF were obtained from the Pure Solve™ PS-400 system under an argon atmosphere. All reagents were purchased from commercially available sources and used as received. Reactions were magnetically stirred under a nitrogen atmosphere, unless otherwise noted and reactions were monitored by either thin layer chromatography (TLC) with 0.25 mm E. Merck pre-coated silica gel plates or analytical high performance liquid chromatography (HPLC). Yields refer to chromatographically and spectroscopically pure compounds. Optical rotations were measured on a JASCO P-2000 polarimeter. Proton and carbon-13 NMR spectra were recorded on a Bruker AM-500 at 305 K, unless otherwise noted. Chemical shifts are reported relative to chloroform ( $\delta$  7.26), methanol ( $\delta$  3.31), or dimethyl sulfoxide ( $\delta$  2.50) for <sup>1</sup>H NMR and either chloroform ( $\delta$  77.0), methanol ( $\delta$  49.2), or dimethyl sulfoxide ( $\delta$  39.4). High-resolution mass spectra (HRMS) were recorded at the University of Pennsylvania Mass Spectroscopy Service Center on either a VG Micromass 70/70H or VG ZAB-E spectrometer. Analytical HPLC was performed with a Waters HPLC-MS system, consisting of a 515 pump and Sunfire C18 reverse phase column (20  $\mu$ L injection volume, 5  $\mu$ m packing material, 4.5 x 50 mm column dimensions) with detection accomplished by a Micromass ZQ mass spectrometer and 2996 PDA detector. Preparative scale HPLC was performed with a Gilson 333/334 preparative pump system equipped with a 5 mL injection loop, Sunfire C18 OBD column (5  $\mu$ m packing material, 19 x 100 mm column dimensions) equipped with a UV-Vis dual wavelength (210 and 254 nm) detector and 215 liquid handling module. Solvent systems employed were based on the following buffers: Buffer A:  $\text{H}_2\text{O}$  containing 0.05% formic acid; Buffer B: MeCN containing 0.05% formic acid. Microwave reactions were run on a Biotage Initiator Microwave Synthesizer. Super-Critical Fluid Chromatography (SFC) purifications were performed with a JASCO system equipped with a Chiralpak AD-H, Chiralpak IC, or Chiralcel OD-H column (10 mm x 250 mm), a PU-280- $\text{CO}_2$  plus  $\text{CO}_2$  Delivery System, a CO-2060 plus Intelligent Column Thermostat, an HC-2068-01 Heater Controller, a BP-2080 plus Automatic Back Pressure Regulator, an MD-2018 plus Photodiode Array Detector (200-648 nm), and PU-2080 plus Intelligent HPLC Pumps. The purity of new compounds was judged by NMR and LCMS (>95%).

### Scheme S.I.-1. Synthesis of ( $\pm$ )-4.

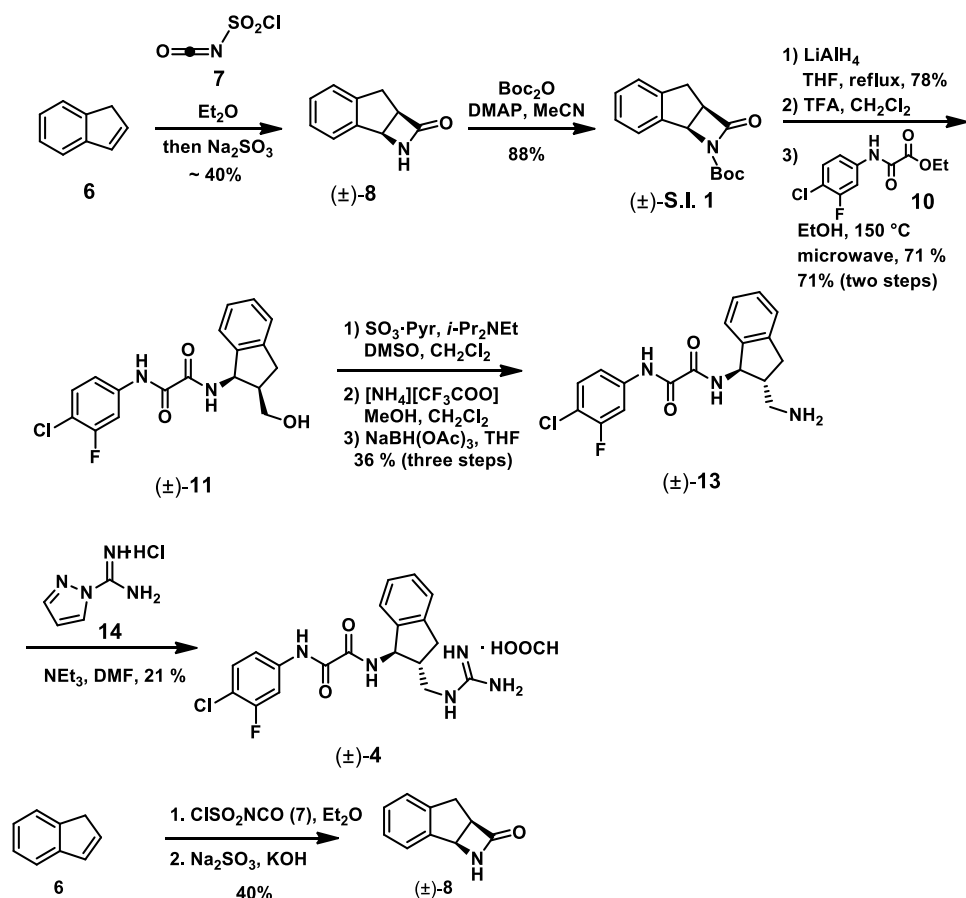

(±)-3,4-Benzo-*cis*-6-azabicyclo[3.2.0]heptane-7-one [(±)-**8**].<sup>1</sup> To a solution of indene **6** (3.62 g, 31.4 mmol) in ether (60 mL) stirring at room temperature was added chlorosulfonyl isocyanate **7** (3.00 mL, 34.5 mmol) in ether (40 mL). The solution was allowed to stir for 2 h at room temperature, at which time, an additional 1.0 mL (11.5 mmol) of neat isocyanate **7** was added and the mixture stirred an additional hour. To the mixture was added 150 mL of hexane and the reaction mixture was stirred vigorously. The precipitate was allowed to settle, and the solvent was gently decanted while retaining an inert atmosphere in the reaction vessel. The solid was then suspended in ether (100 mL) and to the heterogeneous mixture was added 5 mL of 0.2 M aqueous Na<sub>2</sub>SO<sub>3</sub> dropwise (the reaction mixture was kept basic by the occasional dropwise addition of 10% KOH solution). After completing the addition of Na<sub>2</sub>SO<sub>3</sub>, 100 mL of hexanes was added and the heterogeneous solution was filtered. The filtrate was washed with additional hexane and the mother liquor was concentrated to remove ether and filtered again. The crude product was dissolved in a minimal amount of hot methanol and EtOAc was added until the solution remained slightly cloudy. The solution was then cooled and the precipitate collected to provide 2.05 g (40%) of (±)-**8** as a white solid.<sup>1</sup>

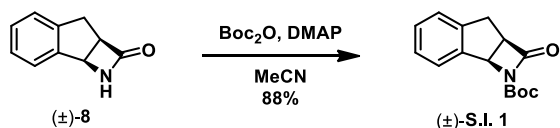

(±)-*N*-Boc-3,4-benzo-*cis*-6-azabicyclo[3.2.0]heptanes-7-one [(±)-S.I. **1**]. To a solution of (±)-**8** (409 mg, 2.57 mmol) in MeCN (10 mL) at 0 °C, was added DMAP (78 mg, 0.64 mmol), followed by Boc<sub>2</sub>O (1.12 g, 5.14 mmol). The solution was warmed to room temperature and stirred for 1 h. The mixture was diluted with CH<sub>2</sub>Cl<sub>2</sub>, washed with a sat. NaHCO<sub>3</sub> solution, and washed with a brine solution. The organic layer was then dried over anhydrous MgSO<sub>4</sub> and concentrated. The crude mixture was purified by silica gel column chromatography using EtOAc/hexanes (10% to 30%) to afford 581 mg (88%) of the pure Boc-protected β-lactam (±)-S.I. **1**.<sup>2</sup>

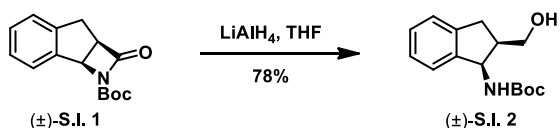

(±)-*N*-Boc-*cis*-2-(hydroxymethyl)indanyl-1-amine [(±)-S.I. **2**]. To a solution of (±)-S.I. **1** (581 mg, 2.25 mmol) in THF (10 mL) at 0 °C was added solid LiAlH<sub>4</sub> (298 mg, 7.86 mmol) portion-wise. The reaction mixture was then warmed to room temperature and stirred overnight. The reaction was then quenched with the dropwise addition of 0.3 mL H<sub>2</sub>O, after 5 minutes, this was followed by 0.3 mL of 15% aqueous NaOH, and then after another 5 minutes, an additional 0.9 mL of H<sub>2</sub>O was added. The heterogeneous mixture was stirred until the solid aluminum salts became white and the precipitate was filtered off. The remaining solution was then concentrated and the residue purified by silica gel column chromatography using EtOAc/hexanes (20% to 50%) to provide 463 mg (78%) of (±)-S.I. **2**. <sup>1</sup>H NMR (500 MHz, DMSO-*d*<sub>6</sub>): δ 7.38 (d, *J* = 6.9 Hz, 1H), 7.19–7.28 (m, 3H), 5.12 (dd, *J* = 6.9, 6.7 Hz, 1H), 4.56 (d, *J* = 6.9 Hz, 1H), 3.75–3.85 (m, 1H), 3.65–3.75 (m, 2H), 2.84 (dd, *J* = 15.0 Hz, 7.3 Hz, 1H), 2.70–2.80 (m, 1H), 2.59 (dd, *J* = 15.0, 9.7 Hz, 1H), 1.47 (s, 9H); HRMS (ES+) *m/z* 286.1422 ([M+Na]<sup>+</sup>; calcd for C<sub>15</sub>H<sub>21</sub>NO<sub>3</sub>Na: 286.1419).

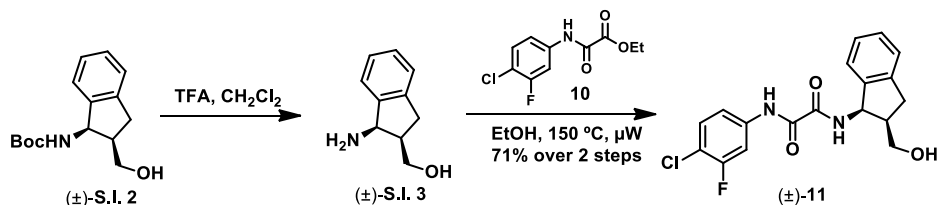

(±)-*N*'-(4-Chloro-3-fluorophenyl)-*N*'-(*cis*-2-(hydroxymethyl)indan-1-yl)oxalamide [(±)-**11**]. To a solution of (±)-S.I. **2** (463 mg, 1.76 mmol) in CH<sub>2</sub>Cl<sub>2</sub> (5 mL) at 0 °C was added TFA (2 mL). The reaction mixture was warmed to room temperature and stirred for 45 min. The solution was then cooled back to 0 °C and the quenched with 2 N NaOH until the pH of the aqueous layer was 13–14. The aqueous layer was extracted with CH<sub>2</sub>Cl<sub>2</sub> (8 x 5 mL), the combined organic layers were then dried over anhydrous Na<sub>2</sub>SO<sub>4</sub> and concentrated to afford amino alcohol (±)-S.I. **3**. The unpurified amine (±)-S.I. **3** was immediately dissolved in EtOH (5 mL) and the solution was transferred into a vial containing oxalamide ester **10**, the vial was then sealed and the solution was heated to 150 °C in a microwave reactor for 1 h. Upon cooling to room temperature, a precipitate formed in the reaction vessel. The precipitate was filtered and washed with small portions of cold CH<sub>2</sub>Cl<sub>2</sub> to provide 455 mg (72%) of (±)-**11** as a white solid. <sup>1</sup>H NMR (500 MHz, DMSO-*d*<sub>6</sub>) δ 11.08 (br. s, 1H), 9.22 (d, *J* = 8.7 Hz, 1H), 7.95 (dd, *J* = 11.8, 2.3 Hz, 1H), 7.73 (dd, *J* = 8.9, 1.8 Hz, 1H), 7.57 (d, *J* = 17.2 Hz, 1H), 7.20–7.28 (m, 3H), 7.13–7.20 (m, 1H), 5.45 (t, *J* = 8.2 Hz, 1H), 4.81 (t, *J* = 4.8 Hz, 1H), 3.51–3.60 (m, 2H), 2.90–3.01 (m, 2H), 2.70–

2.79 (m, 1H);  $^{13}\text{C}$  NMR (125 MHz,  $\text{DMSO-}d_6$ )  $\delta$  159.4, 158.9, 156.8 (d,  $J_{\text{CF}} = 242$  Hz), 142.8, 142.5, 138.3 (d,  $J_{\text{CF}} = 10$  Hz), 130.5, 127.8, 126.4, 124.6, 124.4, 117.3, 114.3 (d,  $J_{\text{CF}} = 18$  Hz), 108.5 (d,  $J_{\text{CF}} = 26$  Hz), 60.8, 55.7, 43.2, 33.6; HRMS (ESI $^-$ )  $m/z = 361.0759$  ( $[\text{M}-\text{H}]^-$ ; calcd for  $\text{C}_{18}\text{H}_{15}\text{N}_2\text{O}_3\text{ClF}$ : 361.0755).

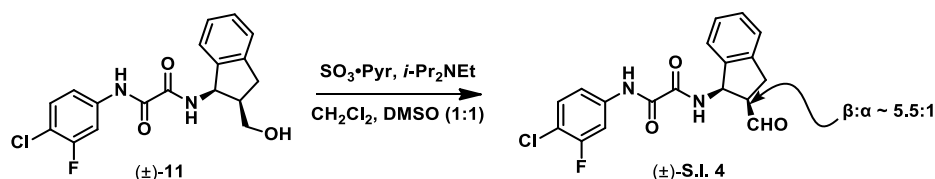

**(±)-*N*<sup>1</sup>-(4-Chloro-3-fluorophenyl)-*N*<sup>2</sup>-(*cis*-2-formylindan-1-yl)oxalamide [(±)-S.I. 4].** To a solution of alcohol (±)-**11** (140 mg, 0.38 mmol) in  $\text{CH}_2\text{Cl}_2/\text{DMSO}$  (1:1, 2 mL) at 0 °C was added *i*-Pr<sub>2</sub>NEt (0.40 mL, 2.32 mmol), followed by  $\text{SO}_3 \cdot \text{Pyr}$  (363 mg, 2.28 mmol). The reaction mixture was stirred at 0 °C for 45 min, and then quenched by the addition of a sat. aqueous  $\text{NaHCO}_3$  (3 mL). The aqueous layer was extracted with  $\text{CH}_2\text{Cl}_2$  (3 x 3 mL), and the combined organic layers washed with brine and dried with anhydrous  $\text{Na}_2\text{SO}_4$ . After concentration of the organic layers, the crude material was then purified by silica gel chromatography using EtOAc/hexanes (20% to 25%) to afford 122 mg (89%) of (±)-**S.I. 4** as an ~5.5:1 mixture of mixture of epimers.  $^1\text{H}$  NMR<sub>major</sub> (500 MHz,  $\text{DMSO-}d_6$ )  $\delta$  11.03 (s, 1H), 9.68 (d,  $J = 1.6$  Hz, 1H), 9.46 (d,  $J = 8.9$  Hz, 1H), 7.92 (dd,  $J = 11.8, 2.2$  Hz, 1H), 7.72 (d,  $J = 9.3$  Hz, 1H), 7.57 (t,  $J = 8.7$  Hz, 1H), 7.19–7.33 (m, 4H), 5.73 (t,  $J = 8.7$  Hz, 1H), 3.56–3.62 (m, 1H), 3.49 (dd,  $J = 15.9, 6.9$  Hz, 1H), 3.04 (dd,  $J = 15.9, 8.5$  Hz, 1H); LC/MS:  $m/z = 361.11$  ( $\text{M}+\text{H}$ )<sup>+</sup>.

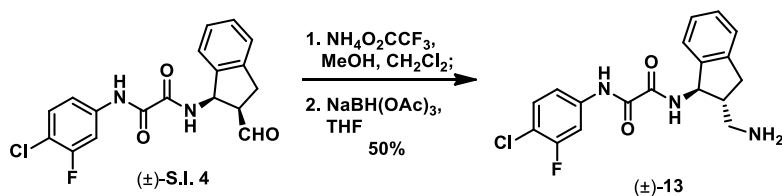

**(±)-*N*<sup>1</sup>-(4-Chloro-3-fluorophenyl)-*N*<sup>2</sup>-(*trans*-2-(aminomethyl)indan-1-yl)oxalamide [(±)-**13**].** To a solution of aldehyde (±)-**S.I. 4** (35 mg, 0.1 mmol) in  $\text{MeOH}/\text{CH}_2\text{Cl}_2$  (1:1, 3 mL) was added ammonium trifluoroacetate (131 mg, 1.0 mmol). The solution was stirred at room temperature overnight. The solvent was then evaporated and the residual solvents were then removed via azeotrope with toluene (~10 mL). The dry solid was then dissolved in THF (5 mL) and the solution stirred for 1 h, at which time,  $\text{NaBH}(\text{OAc})_3$  (25 mg, 0.12 mmol) was added in one portion. The reaction mixture was stirred for 4 h at room temperature, and then concentrated directly onto silica gel. The crude mixture was purified by silica gel chromatography using  $\text{CH}_2\text{Cl}_2/\text{MeOH}$  (2% to 10%) to afford 18 mg (50%) of (±)-**13** as a white solid.  $^1\text{H}$  NMR (500 MHz,  $\text{DMSO-}d_6$ )  $\delta$  9.39 (br. s, 1H), 7.97 (dd,  $J = 11.8, 2.2$  Hz, 1H), 7.75 (d,  $J = 9.0$  Hz, 1H), 7.59 (t,  $J = 8.7$  Hz, 1H), 7.14–7.27 (m, 4H), 5.20 (d,  $J = 6.5$  Hz, 1H), 3.10–3.16 (m, 1H), 2.96–3.02 (m, 2H), 2.71–2.74 (m, 2H);  $^{13}\text{C}$  NMR (125 MHz,  $\text{DMSO-}d_6$ )  $\delta$  160.1, 158.8, 156.8 (d,  $J_{\text{CF}} = 243$  Hz), 142.1, 141.2, 138.3 (d,  $J_{\text{CF}} = 10$  Hz), 130.6, 127.7, 126.6, 124.5, 123.5, 117.3 (d,  $J_{\text{CF}} = 3.3$  Hz), 114.3 (d,  $J_{\text{CF}} = 18$  Hz), 108.4 (d,  $J_{\text{CF}} = 26$  Hz), 57.5, 45.7, 41.8, 34.3; HRMS (ES $^+$ )  $m/z = 362.1067$  ( $[\text{M}+\text{H}]^+$ ; calcd for  $\text{C}_{18}\text{H}_{18}\text{N}_3\text{O}_2\text{FCl}$ : 362.1072).

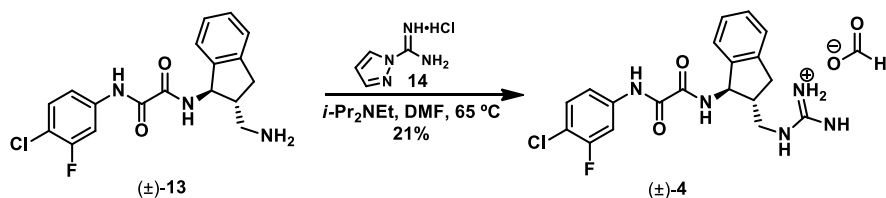

**(±)-*N*<sup>1</sup>-(4-Chloro-3-fluorophenyl)-*N*<sup>2</sup>-(*trans*-2-(guanidinomethyl)indan-1-yl)oxalamide formate salt [(±)-**4**].** To a solution of amine (±)-**13** (15 mg, 0.04 mmol) in DMF (1 mL) was added *i*-Pr<sub>2</sub>NEt (30  $\mu\text{L}$ ), followed by carbamidine **14** (12 mg, 0.08 mmol). The mixture was then heated to 65 °C for 2 h. The reaction mixture was then cooled to room temperature and diluted with MeCN/ $\text{H}_2\text{O}$  (2:1, 1.2 mL) and the product purified via HPLC to provide 3.7 mg (21%) of the formate salt (±)-**4** as a white solid.  $^1\text{H}$  NMR (500 MHz,  $\text{DMSO-}d_6$ )  $\delta$  11.06 (br. s, 1H), 9.41 (d,  $J = 8.8$  Hz, 1H), 8.36 (s, 1H), 8.05 (br. s, 1H), 7.97 (dd,  $J = 11.8, 2.2$  Hz, 1H), 7.75 (d,  $J = 7.5$  Hz, 1H), 7.59 (t,  $J = 8.7$  Hz, 1H), 7.37 (br. s, 3H), 7.14–7.27 (m, 4H), 5.18 (t,  $J = 8.4$  Hz, 1H), 3.30–3.41 (m, 2H), 3.11–3.17 (m, 2H), 2.79–2.84 (m, 1H), 2.65–2.71 (m, 1H);  $^{13}\text{C}$  NMR (125 MHz,  $\text{CD}_3\text{OD}$ )  $\delta$  162.0, 159.8, 159.3 (d,  $J_{\text{CF}} = 245$  Hz), 159.0, 142.8, 142.6, 139.2 (d,  $J_{\text{CF}} = 10$  Hz), 131.9, 129.7, 128.4, 126.1, 125.2, 118.2 (d,  $J_{\text{CF}} = 3.5$  Hz), 117.4 (d,  $J_{\text{CF}} = 18$  Hz), 109.9 (d,  $J_{\text{CF}} = 26$  Hz), 59.4, 48.5, 45.1, 35.5; HRMS (ES $^+$ )  $m/z = 404.1281$  ( $[\text{M}+\text{H}]^+$ ; calcd for  $\text{C}_{19}\text{H}_{20}\text{N}_5\text{O}_2\text{FCl}$ : 404.1290). The formate counterion was not observed under the HRMS conditions.

Scheme S.I.-2. Enantioselective Synthesis of (+)-4.

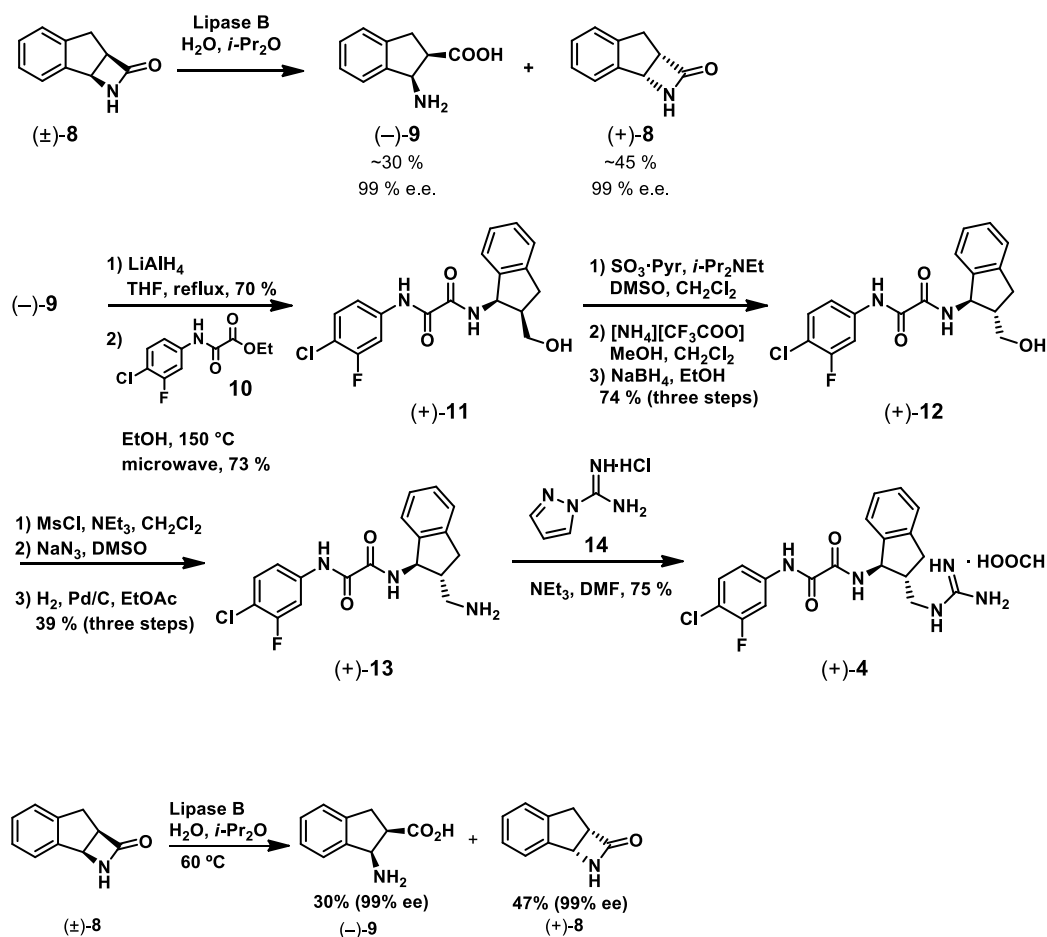

**[(1*R*,2*R*)-1-amino-2,3-dihydro-1*H*-inden-2-carboxylic acid [(-)-9].** Racemic  $\beta$ -lactam  $(\pm)\text{-8}$  (530 mg, 3.32 mmol) was suspended in *i*-Pr<sub>2</sub>O (50 mL). After addition of lipase (1.0 g, lipase B from *Candida antarctica* on styrene) and H<sub>2</sub>O (60  $\mu$ L, 3.32 mmol), the mixture was shaken in a water bath at 60  $^\circ$ C. The reaction was monitored by chiral SFC (Chiralcel OD-H, 20% (0.5% NEt<sub>3</sub>/MeOH)/CO<sub>2</sub>, 254 nm, 4 mL/min, 12 MPa; (+)-isomer:  $t_r$  = 1.8 min and (-)-isomer:  $t_r$  = 2.5 min), and was stopped when the *ee* of  $\beta$ -lactam (+)-8 reached 99%. The reaction mixture was filtered to collect enzyme and amino acid and washed by MeOH several times. The filtrate was evaporated under reduced pressure, and the residue was recrystallized from MeOH/EtOAc to afford  $\beta$ -lactam (+)-8 (250 mg, 47%, 99% *ee*). The filtered enzyme and amino acid were washed with hot H<sub>2</sub>O, and the H<sub>2</sub>O was evaporated under reduced pressure. The residue was washed with small amount of MeOH to afford  $\beta$ -amino acid (-)-9 (175 mg, 30%, 99% *ee*) as a white solid.<sup>3</sup> The enantiomeric excess of  $\beta$ -lactam (+)-8 was determined as 99% *ee* by SFC (Chiralcel OD-H, 20% (0.5% NEt<sub>3</sub>/MeOH)/CO<sub>2</sub>, 254 nm, 4 mL/min, 12 MPa; (+)-enantiomer:  $t_r$  = 1.8 min and (-)-enantiomer:  $t_r$  = 2.5 min). The enantiomeric excess of amino acid (-)-9 was determined as 99% *ee* by SFC (Chiralpak IC, 30% (0.5% NEt<sub>3</sub>/MeOH)/CO<sub>2</sub>, 254 nm, 4 mL/min, 12 MPa; (-)-enantiomer:  $t_r$  = 2.5 min and (+)-enantiomer:  $t_r$  = 3.6 min).

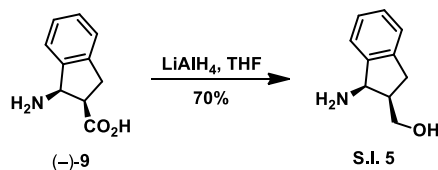

**[(1*R*,2*R*)-1-amino-2,3-dihydro-1*H*-inden-2-yl]methanol (S.I. 5).** To a solution of (-)-9 (121 mg, 0.68 mmol) in THF (5 mL) at 0  $^\circ$ C, LiAlH<sub>4</sub> (104 mg, 2.74 mmol) was carefully added. The solution was heated to reflux and stirred overnight. The reaction mixture was cooled to 0  $^\circ$ C, then quenched with the dropwise addition of 0.10 mL H<sub>2</sub>O, followed by 0.10 mL of 15% aqueous NaOH, then an additional 0.20 mL of H<sub>2</sub>O was added. The heterogeneous mixture was stirred until the solid aluminum salt became white and the precipitate was filtered off. The resulting solution was concentrated to give 78 mg (70%) of S.I. 5 as a pale yellow solid. This compound was used for the next step without further purification (>90% purity estimated by <sup>1</sup>H NMR).<sup>4</sup>

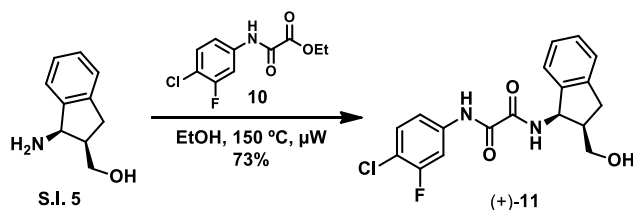

***N'*-(4-Chloro-3-fluorophenyl)-*N*'-((1*R*,2*R*)-2-(hydroxymethyl)-2,3-dihydro-1*H*-inden-1-yl)oxalamide [(+)-11]**. A solution of amino alcohol **S.I. 6** (105 mg, 0.64 mmol) in EtOH (1.5 mL) was transferred into a vial containing oxalamide ester **S.I. 5** (157 mg, 0.64 mmol), the vial was then sealed and the mixture was heated to 150 °C in a microwave reactor for 1 h. Upon cooling to room temperature a precipitate formed in the reaction vessel. The reaction mixture was purified by silica gel column chromatography using EtOAc/hexanes (20% to 100%) to give 171 mg (73%) of (+)-11 as a white solid [<sup>1</sup>H and <sup>13</sup>C NMR data consistent with (±)-11]. [ $\alpha$ ]<sub>D</sub> = +124.8 (*c* 0.21, DMSO).

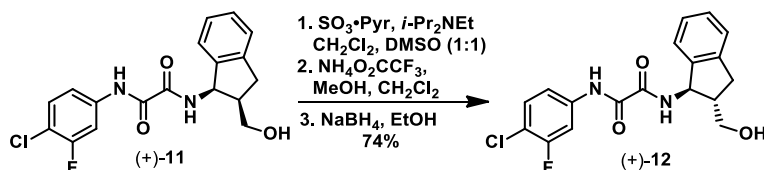

***N'*-(4-Chloro-3-fluorophenyl)-*N*'-((1*R*,2*S*)-2-(hydroxymethyl)-2,3-dihydro-1*H*-inden-1-yl)oxalamide [(+)-12]**. To a solution of alcohol (+)-10 (115 mg, 0.32 mmol) in CH<sub>2</sub>Cl<sub>2</sub>/DMSO (1:1, 4 mL) at 0 °C was added *i*-Pr<sub>2</sub>NEt (0.34 mL, 1.95 mmol), followed by SO<sub>3</sub>·Pyr (303 mg, 1.90 mmol). The reaction mixture was stirred at 0 °C for 1 h, and then quenched by the addition of saturated aqueous NaHCO<sub>3</sub>. The aqueous layer was extracted with CH<sub>2</sub>Cl<sub>2</sub> (3 x 5 mL), and the combined organic layer washed with brine and dried over anhydrous Na<sub>2</sub>SO<sub>4</sub>. After concentration of the organic layer, the residue was purified by silica gel column chromatography using EtOAc/hexanes (10% to 100%) to give the desired aldehyde [<sup>1</sup>H NMR consistent with (±)-**S.I. 4**]. To a solution of the resulting aldehyde in 1:1 MeOH/CH<sub>2</sub>Cl<sub>2</sub> (6 mL) was added ammonium trifluoroacetate (207 mg, 1.58 mmol). The solution was stirred at room temperature overnight, then the reaction mixture was evaporated to remove solvent, the crude residue was dissolved in ethyl acetate, washed with water, dried with Na<sub>2</sub>SO<sub>4</sub>, and concentrated. The <sup>1</sup>H NMR of crude aldehyde indicated that the ratio of epimers was ~8:1 ( $\alpha$ : $\beta$ ) [<sup>1</sup>H NMR<sub>major</sub> (500 MHz, DMSO-*d*<sub>6</sub>)  $\delta$  11.07 (s, 1H), 9.83 (d, *J* = 2.0 Hz, 1H), 9.58 (d, *J* = 8.9 Hz, 1H), 7.95 (dd, *J* = 9.9, 2.3 Hz, 1H), 7.74 (d, *J* = 9.3 Hz, 1H), 7.58 (t, *J* = 8.8 Hz, 1H), 7.16–7.32 (m, 4H), 5.74 (t, *J* = 7.2 Hz, 1H), 3.50–3.57 (m, 1H), 3.21–3.28 (m, 1H), 3.13–3.19 (m, 1H)]. The partially epimerized aldehyde was then dissolved in EtOH, and NaBH<sub>4</sub> was added. After stirring overnight, the reaction mixture was quenched with H<sub>2</sub>O. The mixture was diluted with EtOAc, and washed with H<sub>2</sub>O and brine. The organic layer was dried over anhydrous Na<sub>2</sub>SO<sub>4</sub>, and the residue was washed with a CH<sub>2</sub>Cl<sub>2</sub>/hexanes mixture (1:1) to give 86 mg (74%) of (+)-12 as a white solid. <sup>1</sup>H NMR (500 MHz, DMSO-*d*<sub>6</sub>)  $\delta$  11.06 (s, 1H), 7.96 (dd, *J* = 11.9, 2.2 Hz, 1H), 7.71–7.77 (m, 1H), 7.51–7.61 (m, 1H), 7.11–7.27 (m, 4H), 5.23 (t, *J* = 8.3 Hz, 1H), 4.69 (t, *J* = 5.1 Hz, 1H), 3.48–3.60 (m, 2H), 3.01–3.09 (m, 1H), 2.65–2.77 (m, 2H); <sup>13</sup>C NMR (125 MHz, DMSO-*d*<sub>6</sub>)  $\delta$  159.8, 159.0, 156.8 (d, *J*<sub>CF</sub> = 243 Hz), 142.9, 142.2, 138.2 (d, *J*<sub>CF</sub> = 10 Hz), 130.5, 127.5, 126.4, 124.6, 123.7, 117.3, 114.3 (d, *J*<sub>CF</sub> = 18 Hz), 108.5 (d, *J*<sub>CF</sub> = 26 Hz), 61.8, 56.1, 48.2, 33.4; HRMS (ESI<sup>-</sup>) *m/z* = 361.0751 ([M-H]<sup>-</sup>; calcd for C<sub>18</sub>H<sub>15</sub>N<sub>2</sub>O<sub>3</sub>ClF: 361.0755); [ $\alpha$ ]<sub>D</sub> = +130.2 (*c* 0.21, DMSO).

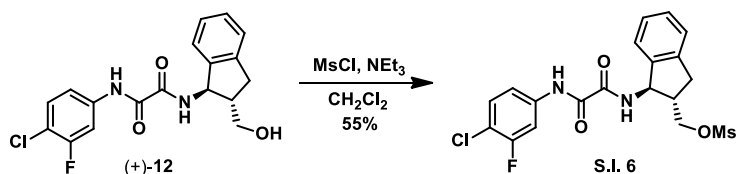

**[(1*R*,2*S*)-1-{2-((4-Chloro-3-fluorophenyl)amino)-2-oxoacetamido}-2,3-dihydro-1*H*-inden-2-yl}methyl] methanesulfonate [**S.I. 6**]**. To a mixture of alcohol (+)-11 (75 mg, 0.21 mmol) and Et<sub>3</sub>N (0.11 mL, 0.79 mmol) in CH<sub>2</sub>Cl<sub>2</sub> (5 mL) at 0 °C was added MsCl (48  $\mu$ L, 0.62 mmol). After stirring overnight, the reaction mixture was concentrated. The residue was diluted with EtOAc and then washed with 1 N HCl, sat. NaHCO<sub>3</sub>, and brine. The organic layer was dried over anhydrous Na<sub>2</sub>SO<sub>4</sub>, concentrated under reduced pressure, and the residue was purified by silica gel column chromatography using EtOAc/hexanes (20% to 100%) to give 50 mg (55%) of **S.I. 6** as a white solid. <sup>1</sup>H NMR (500 MHz, CDCl<sub>3</sub>)  $\delta$  9.34 (s, 1H), 7.80 (d, *J* = 8.5 Hz, 1H), 7.72 (d, *J* = 10.5 Hz, 1H), 7.38 (t, *J* = 8.3 Hz, 1H), 7.22–7.31 (m, 5H), 5.40 (t, *J* = 8.3 Hz, 1H), 4.46 (m, 2H), 3.23 (dd, *J* = 15.8, 8.3 Hz, 1H), 3.09 (s, 3H), 2.92 (dd, *J* = 16.3, 8.8 Hz, 1H), 2.77 (m, 1H); LCMS: *m/z* = 441.0 (M+H)<sup>+</sup>; [ $\alpha$ ]<sub>D</sub> = +34.04 (*c* 0.085, MeOH).

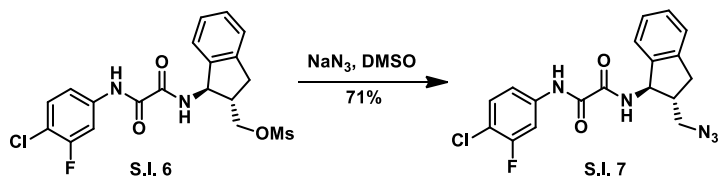

***N*<sup>1</sup>-((1*R*,2*R*)-2-(Azidomethyl)-2,3-dihydro-1*H*-inden-1-yl)-*N*<sup>2</sup>-(4-chloro-3-fluorophenyl)-oxalamide [S.I. 7].** To a solution of **S.I. 6** (50 mg, 0.11 mmol) in DMSO (1 mL) at room temperature, was added NaN<sub>3</sub> (15 mg, 0.23 mmol). The solution was heated to 70 °C and stirred for 3 h at this temperature. The reaction mixture was diluted with EtOAc, and washed with H<sub>2</sub>O and brine. The organic layer was dried over anhydrous Na<sub>2</sub>SO<sub>4</sub>, concentrated under reduced pressure, and the residue was purified by silica gel column chromatography using EtOAc/hexanes (10% to 33%) to give 31 mg (71%) of **S.I. 7** as a white solid. <sup>1</sup>H NMR (500 MHz, CDCl<sub>3</sub>) δ 9.40 (s, 1H), 7.78 (d, *J* = 8.5 Hz, 1H), 7.72 (d, *J* = 10.0 Hz, 1H), 7.38 (t, *J* = 8.0 Hz, 1H), 7.20–7.34 (m, 5H), 5.33 (t, *J* = 8.0 Hz, 1H), 3.57–3.67 (m, 2H), 3.19 (dd, *J* = 16.0, 7.5 Hz, 1H), 2.83 (dd, *J* = 15.8, 8.3 Hz, 1H), 2.58 (dd, *J* = 13.5, 7.0 Hz, 1H); <sup>13</sup>C NMR (125 MHz, CDCl<sub>3</sub>) δ 159.9, 158.4 (d, *J*<sub>CF</sub> = 247 Hz), 157.5, 141.7, 140.6, 136.4 (d, *J*<sub>CF</sub> = 9.5 Hz), 131.1, 129.1, 127.6, 125.3, 124.2, 117.5 (d, *J*<sub>CF</sub> = 17 Hz), 116.2 (d, *J*<sub>CF</sub> = 3.5 Hz), 108.7 (d, *J*<sub>CF</sub> = 26 Hz), 58.0, 53.7, 48.7, 34.7; HRMS (ESI<sup>-</sup>) *m/z* = 386.0808 ([*M*-H]<sup>-</sup>; calcd for C<sub>18</sub>H<sub>14</sub>N<sub>5</sub>O<sub>2</sub>ClF: 386.0809); [*α*]<sub>D</sub> = +35.06 (*c* 0.12, CHCl<sub>3</sub>).

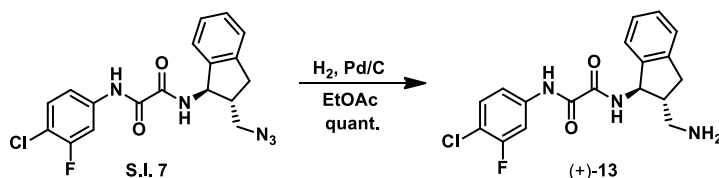

***N*<sup>1</sup>-((1*R*,2*R*)-2-(Aminomethyl)-2,3-dihydro-1*H*-inden-1-yl)-*N*<sup>2</sup>-(4-chloro-3-fluorophenyl)-oxalamide [(+)-13].** To a solution of **S.I. 7** (31 mg, 0.080 mmol) in EtOAc (4 mL) at room temperature, was added Pd-C (8 mg). The solution was stirred for 2.5 h at room temperature under H<sub>2</sub> balloon. The reaction mixture was filtered through celite, and the solvent was removed under reduced pressure to give 29 mg (quantitative yield) of (+)-**13** as a white solid [<sup>1</sup>H and <sup>13</sup>C NMR data consistent with (±)-**13**]. [*α*]<sub>D</sub> = +85.58 (*c* 0.18, DMSO).

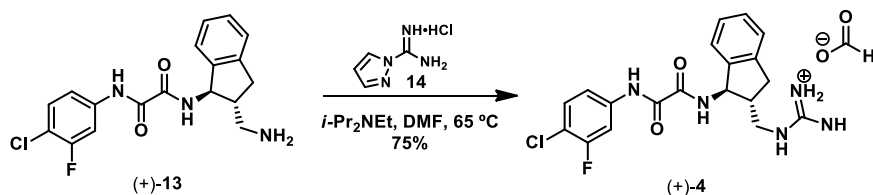

**(+)-*N*<sup>1</sup>-(4-Chloro-3-fluorophenyl)-*N*<sup>2</sup>-(*trans*-2-(guanidinomethyl)indan-1-yl)oxalamide formate salt [(+)-4].** To a solution of amine (+)-**13** (25 mg, 0.080 mmol) in DMF (0.5 mL) was added *i*-Pr<sub>2</sub>NEt (56 μL, 0.32 mmol), followed by carbamidine **13** (23 mg, 0.16 mmol). The mixture was then heated to 65 °C for 3 h, then cooled to room temperature and diluted with CH<sub>3</sub>CN and the product purified via HPLC to afford 27 mg (75%) of the formate salt of (+)-**4** as a white solid (<sup>1</sup>H and <sup>13</sup>C NMR consistent with (±)-**4**). [*α*]<sub>D</sub> = +45.05 (*c* 0.28, MeOH); 99% *ee* by SFC (Chiralpak IC, 40% (0.5% NEt<sub>3</sub>/MeOH)/CO<sub>2</sub>, 254 nm, 4 mL/min, 12 MPa): (1*R*,2*R*)-enantiomer [cf. (+)-**4**]: *t*<sub>r</sub> = 3.1 min (major) and (1*S*,2*S*)-enantiomer [cf. (-)-**4**]: *t*<sub>r</sub> = 4.2 min (minor).

Scheme S.I.-3. Synthesis of (+)-**5** and separation of enantiomers.

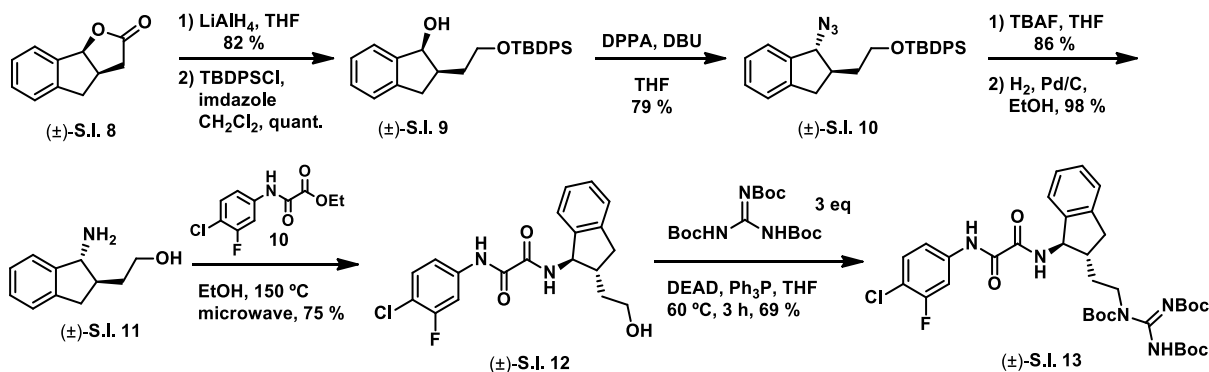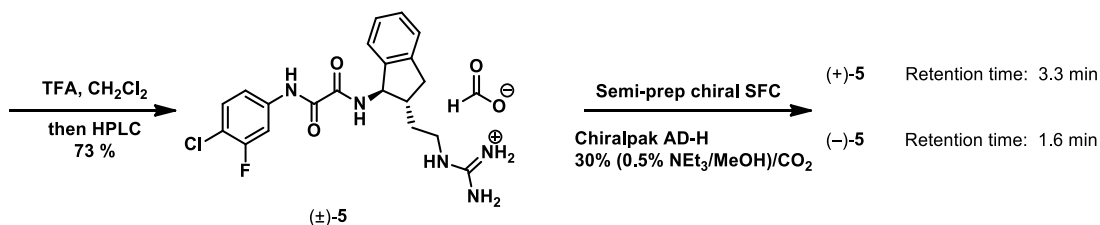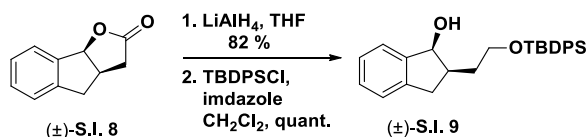

**(±)-2-(2-((*tert*-Butyldiphenylsilyloxy)ethyl)-2,3-dihydro-1*H*-inden-1-yl)ethoxy)(*tert*-butyl)diphenylsilane [(±)-S.I. 9].** A suspension of LiAlH<sub>4</sub> (673 mg, 17.7 mmol) in THF (10 mL) at 0 °C was added a solution of lactone (±)-S.I. 8<sup>17</sup> (298 mg, 7.86 mmol) in THF (10 mL). The reaction mixture was then warmed to room temperature and stirred for 3 h. The reaction was then quenched with the dropwise addition of 0.68 mL H<sub>2</sub>O, after 5 minutes, this was followed by 0.68 mL of 15% aqueous NaOH, and then after another 5 minutes, an additional 1.3 mL of H<sub>2</sub>O was added. The heterogeneous mixture was stirred until the solid aluminum salts became white and the precipitate was filtered off. The remaining solution was then concentrated and the residue purified by silica gel column chromatography using EtOAc/hexanes (20% to 33%) to provide the diol compound (863 mg, 82%) as a white solid. <sup>1</sup>H NMR (500 MHz, CDCl<sub>3</sub>) δ 7.43 (d, *J* = 7.5 Hz, 1H), 7.20–7.30 (m, 3H), 5.13 (d, *J* = 5.5 Hz, 1H), 3.82–3.92 (m, 1H), 3.78–3.81 (m, 1H), 2.97 (dd, *J* = 15.8, 7.7 Hz, 1H), 2.82 (dd, *J* = 15.8, 8.8 Hz, 1H), 2.46–2.52 (m, 1H), 2.01–2.09 (m, 1H), 1.83–1.89 (m, 1H). The diol (460 mg, 2.58 mmol) was dissolved in CH<sub>2</sub>Cl<sub>2</sub> (20 mL) and the solution was cooled to 0 °C. To this solution were added imidazole (193 mg, 2.83 mmol) and *t*-butyldiphenylsilyl chloride (0.73 mL, 2.85 mmol). The reaction mixture was then warmed to room temperature and stirred for 6 h. After the solution was concentrated, the residue was diluted with EtOAc, and washed with H<sub>2</sub>O and brine. The organic layer was dried over anhydrous Na<sub>2</sub>SO<sub>4</sub>, concentrated under reduced pressure, and the residue was purified by silica gel column chromatography using EtOAc/hexanes (2% to 10%) to give (±)-S.I. 9 (1.07 g, 99%) as a colorless oil. <sup>1</sup>H NMR (500 MHz, CDCl<sub>3</sub>) δ 7.72–7.74 (m, 2H), 7.65–7.67 (m, 2H), 7.39–7.49 (m, 7H), 7.24–7.29 (m, 3H), 5.16 (d, *J* = 4.5 Hz, 1H), 3.82–3.85 (m, 1H), 3.74–3.79 (m, 1H), 2.94 (dd, *J* = 15.8, 7.8 Hz, 1H), 2.87 (s, 1H), 2.80 (dd, *J* = 15.8, 8.8 Hz, 1H), 2.53–2.58 (m, 1H), 2.06–2.13 (m, 1H), 1.80–1.86 (m, 1H), 1.09 (s, 9H); <sup>13</sup>C NMR (125 MHz, CDCl<sub>3</sub>) δ 144.9, 143.6, 135.8, 133.3, 130.0, 128.6, 128.0, 126.8, 125.5, 124.9, 76.5, 63.8, 43.7, 37.0, 32.0, 27.0, 19.2; HRMS (ES+) *m/z* = 439.2072 ([M+Na]<sup>+</sup>; calcd for C<sub>27</sub>H<sub>32</sub>O<sub>2</sub>SiNa: 439.2096).

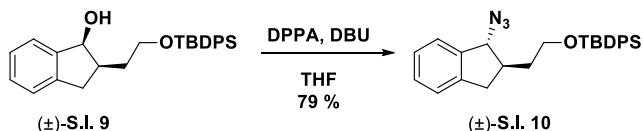

**(2-((±)-1-Azido-2,3-dihydro-1*H*-inden-2-yl)ethoxy)(*tert*-butyl)diphenylsilane [(±)-S.I. 10].** To a solution of (±)-S.I. 9 (473 mg, 1.14 mmol) in THF (5 mL) at 0 °C, was added diphenylphosphoryl azide (DPPA, 0.49 mL, 1.48 mmol). The solution was stirred at 0 °C for 5 min, and then DBU (0.22 mL, 1.47 mmol) was added. After 10 min, the solution was allowed to warm up to room temperature and stirred overnight. The reaction mixture was diluted with EtOAc, and washed with H<sub>2</sub>O and brine. The organic layer was dried over anhydrous Na<sub>2</sub>SO<sub>4</sub>, concentrated under reduced pressure, and the residue was purified by silica gel column chromatography using 3% EtOAc/hexanes to give (±)-S.I. 10 (378 mg, 75%) as a colorless oil. <sup>1</sup>H NMR (500 MHz, CDCl<sub>3</sub>) δ 7.68 (dd, *J* = 8.0, 1.5 Hz, 4H),

7.34–7.45 (m, 8H), 7.19–7.24 (m, 2H), 4.43 (d,  $J = 6.5$  Hz, 1H), 3.75–3.85 (m, 2H), 3.10 (dd,  $J = 15.5, 7.5$  Hz, 1H), 2.49–2.61 (m, 2H), 1.96–2.03 (m, 1H), 1.68–1.75 (m, 1H), 1.07 (s, 9H);  $^{13}\text{C}$  NMR (125 MHz,  $\text{CDCl}_3$ )  $\delta$  142.6, 140.7, 135.8, 134.0, 129.9, 128.8, 127.9, 127.1, 125.2, 124.5, 71.2, 62.5, 44.3, 36.7, 29.9, 27.1, 19.4; HRMS (ES<sup>+</sup>)  $m/z = 414.2260$  ( $[\text{M}-\text{N}_2]^+$ ; calcd for  $\text{C}_{27}\text{H}_{31}\text{NO}$ : 414.2253).

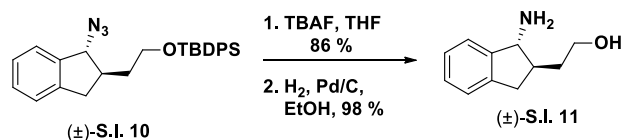

**2-( $\pm$ )-1-Amino-2,3-dihydro-1H-inden-2-yl)ethanol [( $\pm$ )-S.I. 11].** To a solution of ( $\pm$ )-S.I. 10 (370 mg, 0.84 mmol) in THF (5 mL) at room temperature, was added a 1 M solution of TBAF (2.51 mL, 1.48 mmol) in THF. After stirring the mixture for 3 h, the reaction mixture was diluted with EtOAc, and washed with  $\text{H}_2\text{O}$  and brine. The organic layer was dried over anhydrous  $\text{Na}_2\text{SO}_4$ , concentrated under reduced pressure, and the residue was purified by silica gel column chromatography using EtOAc/hexanes (10% to 33%) to give the alcohol compound (147 mg, 86%) as a colorless oil.  $^1\text{H}$  NMR (500 MHz,  $\text{CDCl}_3$ )  $\delta$  7.37–7.38 (m, 1H), 7.23–7.28 (m, 3H), 4.49 (d,  $J = 7.0$  Hz, 1H), 3.83 (m, 2H), 3.20 (dd,  $J = 15.5, 8.0$  Hz, 1H), 2.62 (dd,  $J = 15.8, 8.3$  Hz, 1H), 2.51–2.55 (m, 1H), 1.95–2.02 (m, 1H), 1.80–1.87 (m, 1H). To a solution of the alcohol compound (147 mg, 0.72 mmol) in EtOH (3 mL) at room temperature, was added Pd-C (20 mg). The solution was stirred for 3 h at room temperature under  $\text{H}_2$  balloon. The reaction mixture was filtered through celite, and the solvent was removed under reduced pressure to give ( $\pm$ )-S.I. 11 (126 mg, 98%) as a white solid.  $^1\text{H}$  NMR (500 MHz,  $\text{CDCl}_3$ )  $\delta$  7.19–7.24 (m, 4H), 3.94 (d,  $J = 9.5$  Hz, 1H), 3.81–3.85 (m, 1H), 3.68–3.73 (m, 1H), 3.01 (dd,  $J = 15.5, 7.5$  Hz, 1H), 2.62 (dd,  $J = 15.5, 10.5$  Hz, 1H), 1.98–2.04 (m, 2H), 1.84–1.89 (m, 1H);  $^{13}\text{C}$  NMR (125 MHz,  $\text{CDCl}_3$ )  $\delta$  147.2, 141.7, 127.6, 126.9, 124.6, 122.6, 62.6, 62.0, 51.9, 37.9, 37.7; LCMS:  $m/z = 178.2$  ( $\text{M}+\text{H}$ )<sup>+</sup>.

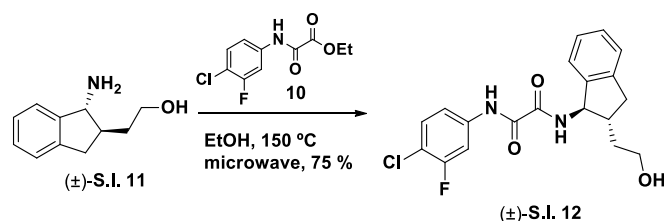

**( $\pm$ )- $N^1$ -(4-Chloro-3-fluorophenyl)- $N^2$ -2-(2-hydroxyethyl)-2,3-dihydro-1H-inden-1-yl)oxalamide [( $\pm$ )-S.I. 12].** A solution of amino alcohol ( $\pm$ )-S.I. 11 (61 mg, 0.35 mmol) in EtOH (1.5 mL) was transferred into a vial containing oxalate **10** (87 mg, 0.35 mmol), the vial was then sealed and the mixture was heated to 150 °C in a microwave reactor for 1 h. The reaction mixture was purified by silica gel column chromatography using EtOAc/hexanes (20% to 100%) to give ( $\pm$ )-S.I. 12 (111 mg, 83%) as a white solid.  $^1\text{H}$  NMR (500 MHz,  $\text{DMSO}-d_6$ )  $\delta$  11.10 (s, 1H), 9.32 (d,  $J = 9.0$  Hz, 1H), 7.98 (dd,  $J = 12.0, 2.5$  Hz, 1H), 7.76 (dd,  $J = 9.0, 1.5$  Hz, 1H), 7.57 (t,  $J = 8.8$  Hz, 1H), 7.14–7.22 (m, 3H), 7.11 (d,  $J = 7.0$  Hz, 1H), 5.09 (t,  $J = 9.0$  Hz, 1H), 4.47 (t,  $J = 5.0$  Hz, 1H), 3.47–3.54 (m, 1H), 3.08 (dd,  $J = 14.5, 7.0$  Hz, 1H), 2.50–2.63 (m, 2H), 1.84 (m, 1H), 1.65 (m, 1H);  $^{13}\text{C}$  NMR (125 MHz,  $\text{DMSO}-d_6$ )  $\delta$  160.0, 159.0, 156.9 (d,  $J_{\text{CF}} = 243$  Hz), 143.0, 142.0, 138.4 (d,  $J_{\text{CF}} = 10$  Hz), 130.6, 127.4, 126.3, 124.5, 123.3, 117.3 (d,  $J_{\text{CF}} = 3.1$  Hz), 114.4 (d,  $J_{\text{CF}} = 17$  Hz), 108.5 (d,  $J_{\text{CF}} = 25$  Hz), 59.8, 59.6, 43.6, 36.3, 36.1; LCMS:  $m/z = 377.1$  ( $\text{M}+\text{H}$ )<sup>+</sup>.

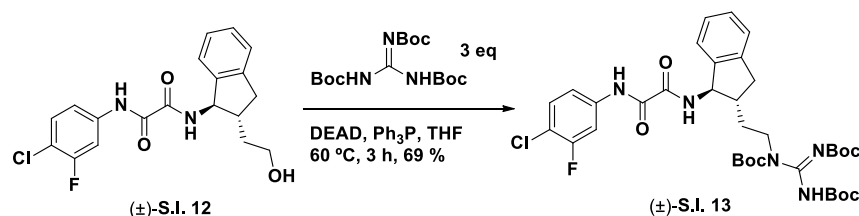

**( $\pm$ )-Tri-Boc-guanidine compound [( $\pm$ )-S.I. 13].**<sup>18</sup> To a suspension of alcohol ( $\pm$ )-S.I. 12 (28 mg, 0.074 mmol), tri-Boc-guanidine (80 mg, 0.22 mmol), and  $\text{Ph}_3\text{P}$  (29 mg, 0.11 mmol), was added diethyldiazocarbonylate (DEAD, 17  $\mu\text{L}$ , 0.11 mmol) at room temperature. The reaction mixture was heated to 60 °C, and stirred for 3 h. The reaction mixture was concentrated under reduced pressure, the residue was purified by silica gel column chromatography using EtOAc/hexanes (10% to 20%) to give a mixture of ( $\pm$ )-S.I. 14 and tri-Boc-guanidine reagent. The mixture was suspended in hexanes, and then filtered off to remove precipitate. The residue was concentrated to yield ( $\pm$ )-S.I. 13 (37 mg, 69%) as a white crystalline solid.  $^1\text{H}$  NMR (500 MHz,  $\text{CDCl}_3$ )  $\delta$  10.56 (br. s, 1H), 9.48 (s, 1H), 7.72–7.78 (m, 2H), 7.14–7.35 (m, 6H), 5.15 (t,  $J = 8.8$  Hz, 1H), 3.87–3.93 (m, 2H), 3.22 (dd,  $J = 16.0, 8.0$  Hz, 1H), 2.65 (dd,  $J = 16.0, 9.0$  Hz, 1H), 2.38 (m, 1H), 2.11 (m, 1H), 1.85 (m, 1H), 1.51 (s, 27H); LCMS:  $m/z = 718.3$  ( $\text{M}+\text{H}$ )<sup>+</sup>.



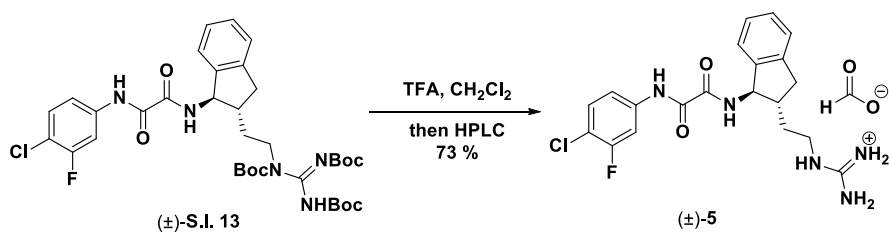

**(±)-*N*<sup>1</sup>-(4-Chloro-3-fluorophenyl)-*N*<sup>2</sup>-(*trans*-2-(2-guanidinoethyl)indan-1-yl)oxalamide formate salt [(±)-5].** To a solution of (±)-**S.I. 13** (57 mg, 0.079 mmol) in CH<sub>2</sub>Cl<sub>2</sub> (31 mL) at room temperature, was added trifluoroacetic acid (0.3 mL). The reaction mixture was stirred at room temperature for 4 h, then concentrated and diluted with CH<sub>3</sub>CN and the product purified via HPLC to afford (±)-**5** (27 mg, 73%) as a white solid. <sup>1</sup>H NMR (500 MHz, DMSO-*d*<sub>6</sub>) δ 11.08 (br. s, 1H), 9.41 (d, *J* = 9.0 Hz, 1H), 8.42 (s, 1H), 8.12 (br s, 1H), 7.97 (dd, *J* = 12.0, 2.0 Hz, 1H), 7.76 (d, *J* = 9.0 Hz, 1H), 7.59 (t, *J* = 9.0 Hz, 1H), 7.35 (br s, 4H), 7.11–7.34 (m, 4H), 5.10 (t, *J* = 9.0 Hz, 1H), 3.07–3.21 (m, 3H), 2.50–2.63 (m, 2H), 1.88 (m, 1H), 1.72 (m, 1H); <sup>13</sup>C NMR (125 MHz, CD<sub>3</sub>OD) δ 161.9, 160.0, 159.3 (d, *J*<sub>CF</sub> = 244 Hz), 158.8, 143.2, 143.1, 139.3 (d, *J*<sub>CF</sub> = 10 Hz), 131.9, 129.4, 128.1, 125.9, 124.8, 118.2 (d, *J*<sub>CF</sub> = 3.3 Hz), 117.4 (d, *J*<sub>CF</sub> = 18 Hz), 110.0 (d, *J*<sub>CF</sub> = 26 Hz), 61.4, 47.0, 41.3, 37.4, 33.7; HRMS (ES+) *m/z* 418.1450 ([M+H]<sup>+</sup>; calcd for C<sub>20</sub>H<sub>22</sub>N<sub>5</sub>O<sub>2</sub>FCl: 418.1446). The formate counterion was not observed under the HRMS conditions. The enantiomers were separated by semi-preparative chiral SFC (Chiralpak AD-H (10 × 250 mm, 5 μm), 30% (0.5% NEt<sub>3</sub>/MeOH)/CO<sub>2</sub>, 254 nm, 4 mL/min, 12 MPa). The resulting enantiomers were analyzed by analytical chiral SFC (Chiralpak AD-H, 40% (0.5% NEt<sub>3</sub>/MeOH)/CO<sub>2</sub>, 254 nm, 4 mL/min, 12 MPa; (–)-**5**: *t*<sub>r</sub> = 1.6 min and (+)-**5**: *t*<sub>r</sub> = 3.3 min) and the e.e. of both enantiomers was determined as >96%; (–)-**5**: [α]<sub>D</sub> = –138.74 (*c* 0.085, MeOH) and (+)-**5**: [α]<sub>D</sub> = +136.85 (*c* 0.085, MeOH). The absolute stereochemistry of **5** was assigned based on analogy to previously determined compounds (+)-**4** and (+)-**12**.

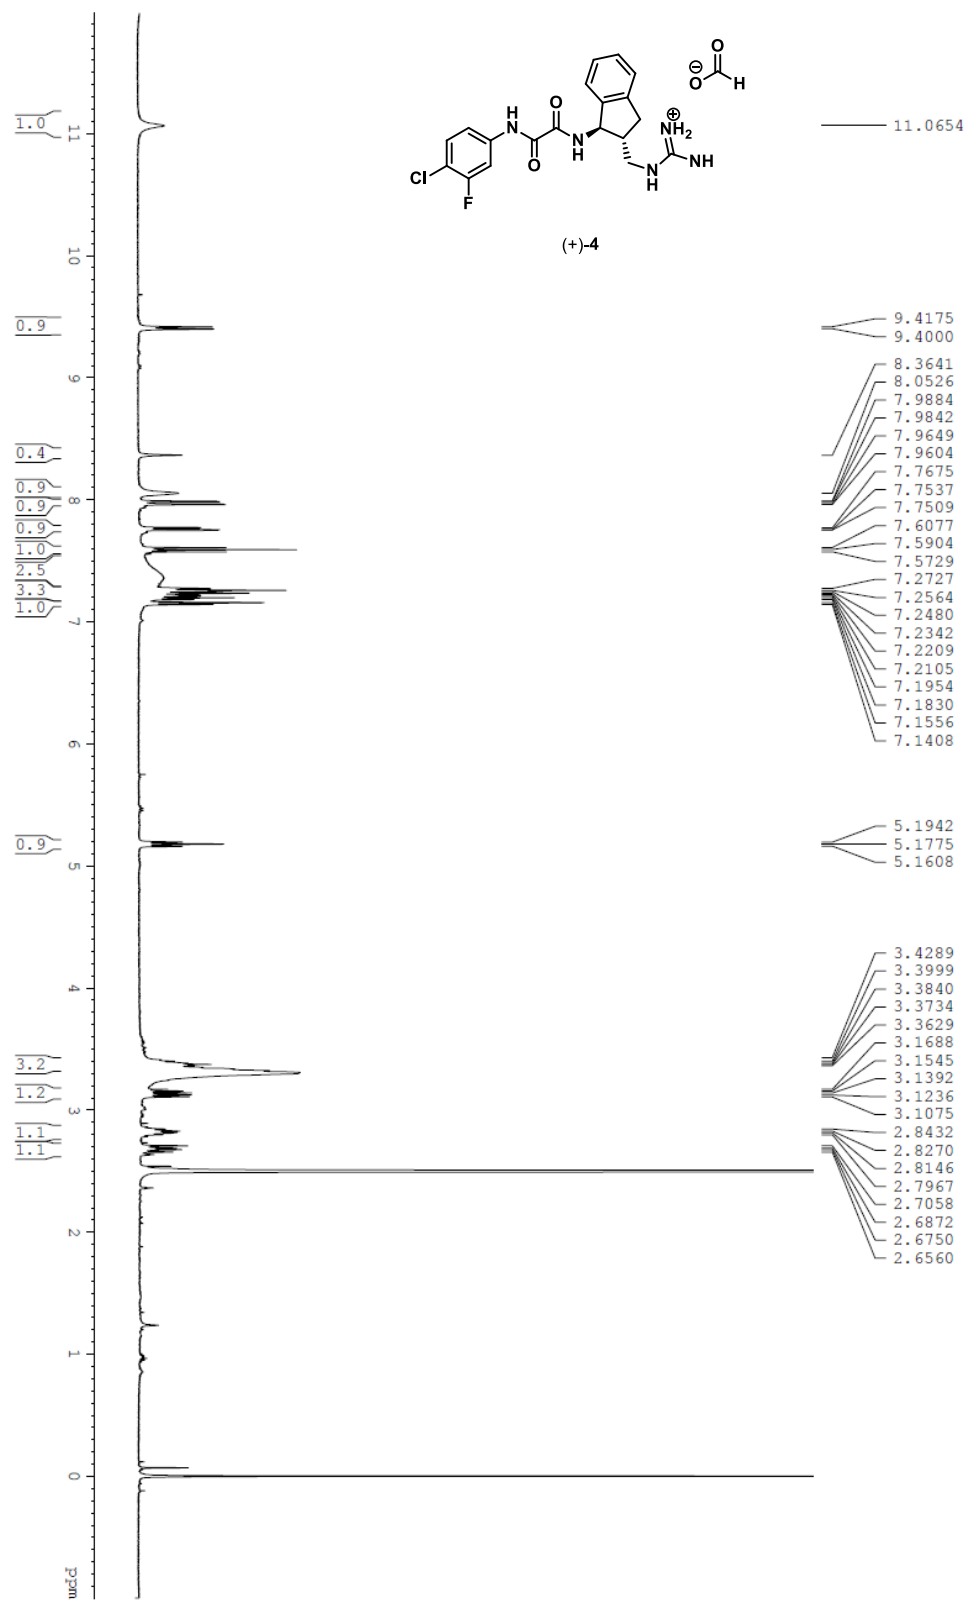

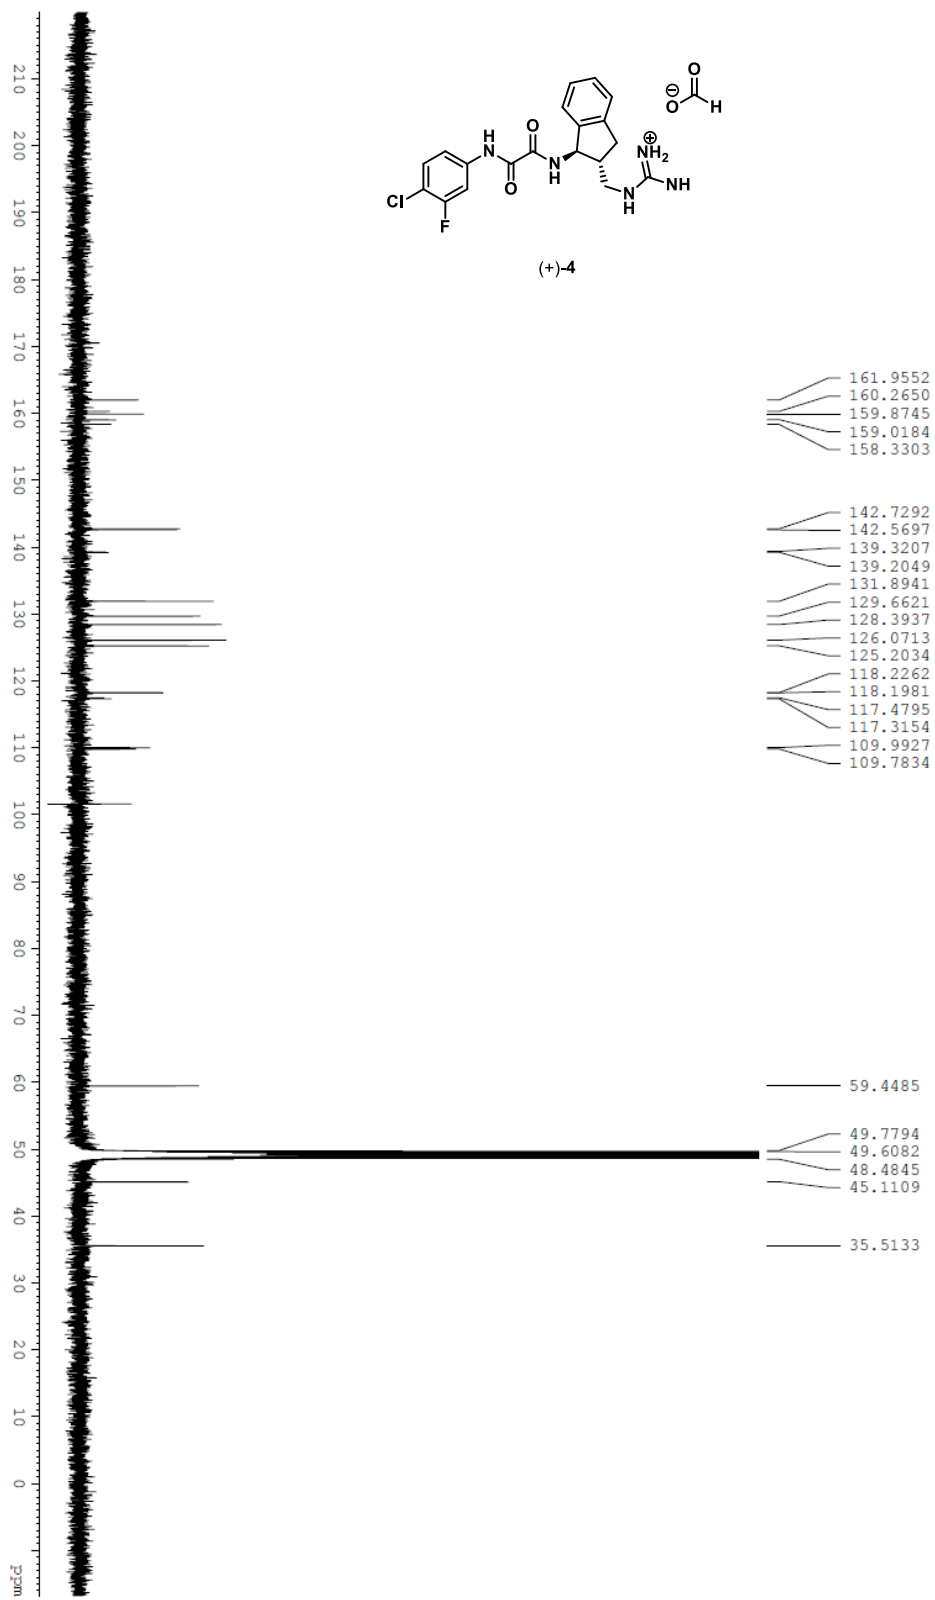

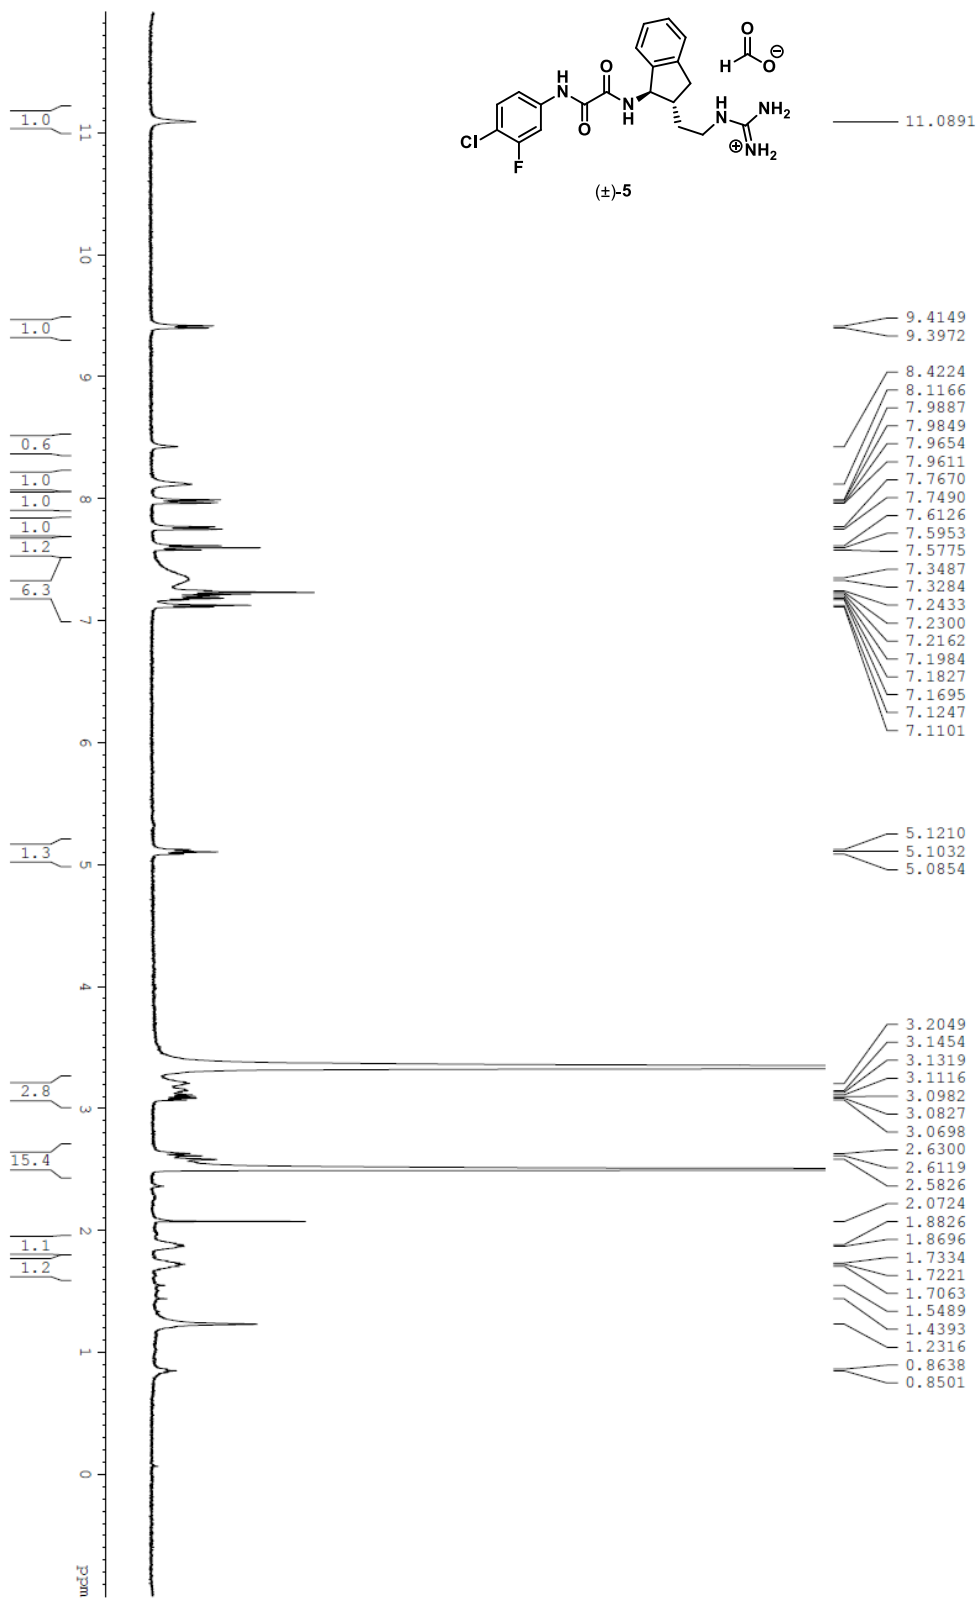

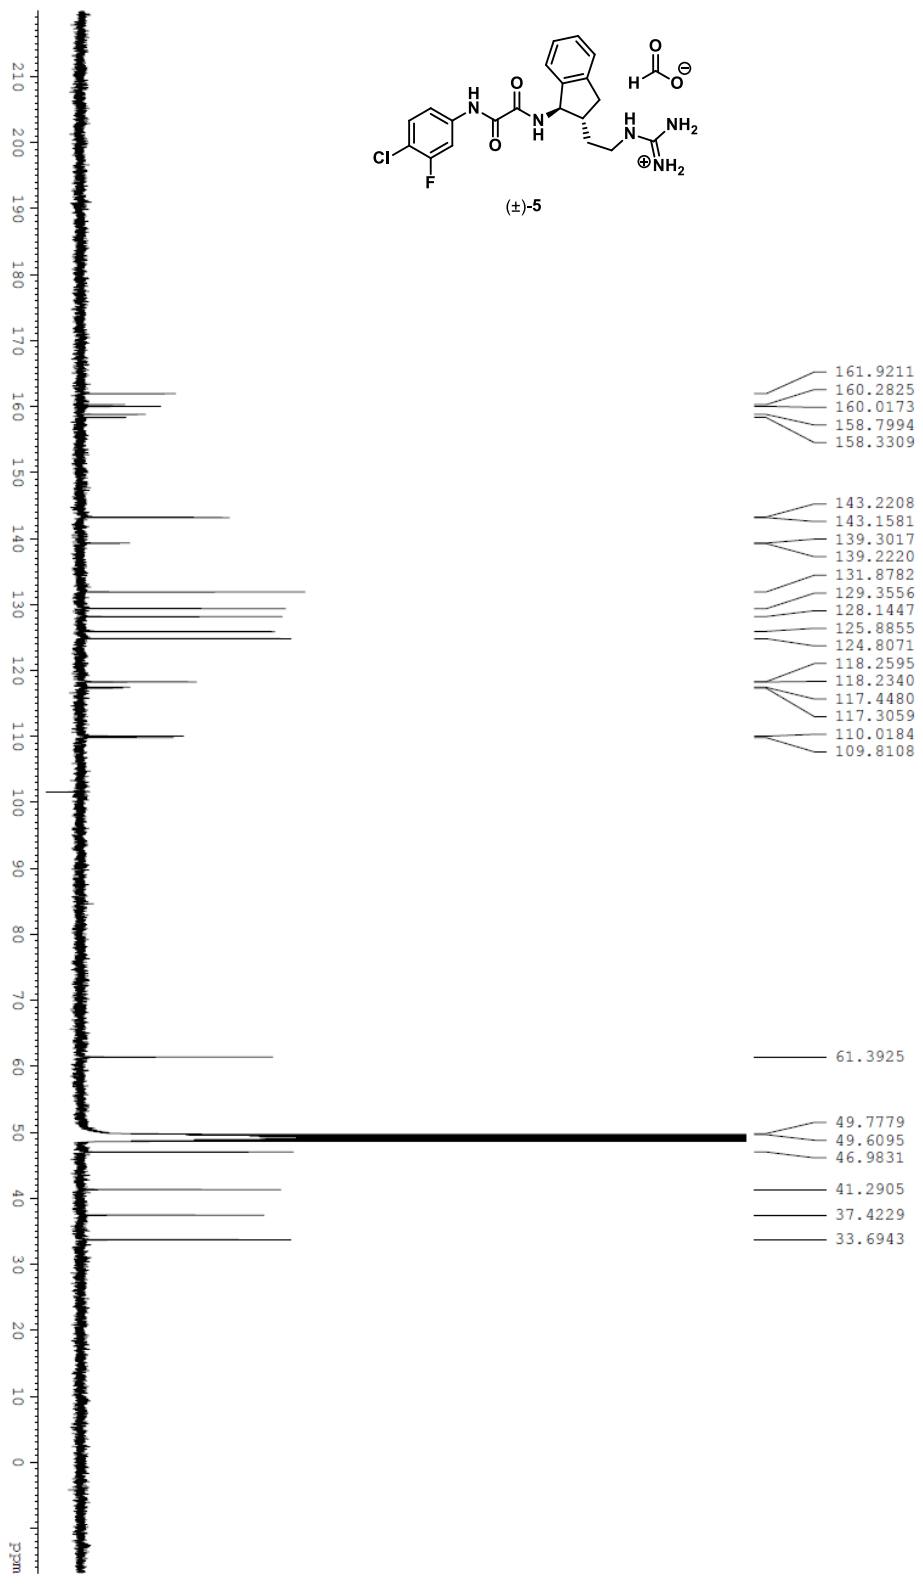

## References:

1. Kwon, Y. D.; Finzi, A.; Wu, X.; Dogo-isonagie, C.; Lee, L. K.; Moore, L. R.; Schmidt, S. R.; Stuckey, J.; Yang, Y.; Zhou, T.; Zhu, J.; Vicoice, D. A.; Debnath, A. K.; Shapiro, L.; Bewley, C. A.; Mascola, J. R.; Sodroski, J.; Kwong, P. D. Unliganded HIV-1 gp120 Structures Reveal Propensity of Core to Assume the CD4-Bound Conformation with Regulation by Quaternary Interactions and Variable Loops. *Proc Natl Acad Sci U S A* **2012**, *109*, 5663-5668.
2. Babcock, G. J.; Mirzabekov, T.; Wojtowicz, W.; Sodroski, J. Ligand binding characteristics of CXCR4 incorporated into paramagnetic proteoliposomes. *J. Biol. Chem.* **2001**, *276*, 38433-38440.
3. Mirzabekov, T.; Bannert, N.; Farzan, M.; Hofmann, W.; Kolchinsky, P.; Wu, L.; Wyatt, R.; Sodroski, J. Enhanced Expression, Native Purification, and Characterization of CCR5, a Principal HIV-1 Coreceptor. *J. Biol. Chem.* **1999**, *274*, 28745-28750.
4. Rho, H. M.; Poiesz, B.; Ruscetti, F. W.; Gallo, R. C. Characterization of the reverse transcriptase from a new retrovirus (HTLV) produced by a human cutaneous T-cell lymphoma cell line *Virology* **1981**, *112*, 355-360.
5. Li, M.; Gao, F.; Mascola, J. R.; Stamatatos, L.; Polonis, V. R.; Koutsoukos, M.; Voss, G.; Goepfert, P.; Gilbert, P.; Greene, K. M.; Bilska, M.; Kothe, D. L.; Salazar-Gonzalez, J. F.; Wei, X.; Decker, J. M.; Hahn, B. H.; Montefiori, D. C. Human immunodeficiency virus type 1 env clones from acute and early subtype B infections for standardized assessments of vaccine-elicited neutralizing antibodies. *J Virol* **2005**, *79*, 10108-10125.
6. Li, M.; Salazar-Gonzalez, J. F.; Derdeyn, C. A.; Morris, L.; Williamson, C.; Robinson, J. E.; Decker, J. M.; Li, Y.; Salazar, M. G.; Polonis, V. R.; Mlisana, K.; Karim, S. A.; Hong, K.; Greene, K. M.; Bilska, M.; Zhou, J.; Allen, S.; Chomba, E.; Mulenga, J.; Vwalika, C.; Gao, F.; Zhang, M.; Korber, B. T.; Hunter, E.; Hahn, B. H.; Montefiori, D. C. Genetic and neutralization properties of subtype C human immunodeficiency virus type 1 molecular env clones from acute and early heterosexually acquired infections in Southern Africa. *J Virol* **2006**, *80*, 11776-11790.
7. Seaman, M. S.; Janes, H.; Hawkins, N.; Grandpre, L. E.; Devoy, C.; Giri, A.; Coffey, R. T.; Harris, L.; Wood, B.; Daniels, M. G.; Bhattacharya, T.; Lapedes, A.; Polonis, V. R.; McCutchan, F. E.; Gilbert, P. B.; Self, S. G.; Korber, B. T.; Montefiori, D. C.; Mascola, J. R. Tiered categorization of a diverse panel of HIV-1 Env pseudoviruses for assessment of neutralizing antibodies. *J Virol* **2010**, *84*, 1439-1452.
8. LaLonde, J. M.; Kwon, Y. D.; Jones, D. M.; Sun, A. W.; Courter, J. R.; Soeta, T.; Kobayashi, T.; Princiotta, A. M.; Wu, X.; Schön, A.; Freire, E.; Kwong, P. D.; Mascola, J. R.; Sodroski, J.; Madani, N.; Smith III, A. B. Dual Hot Spot Structure-Based Design, Synthesis and Characterization of Small-Molecule HIV-1 Entry Inhibitors. *J. Med. Chem.* **2012**, *55*, 4382-4396.
9. Brower, E. T.; Schon, A.; Klein, J. C.; Freire, E. Binding thermodynamics of the N-terminal peptide of the CCR5 coreceptor to HIV-1 envelope glycoprotein gp120. *Biochemistry* **2009**, *48*, 779-85.
10. Schon, A.; Madani, N.; Klein, J. C.; Hubicki, A.; Ng, D.; Yang, X.; Smith, A. B., 3rd; Sodroski, J.; Freire, E. Thermodynamics of binding of a low-molecular-weight CD4 mimetic to HIV-1 gp120. *Biochemistry* **2006**, *45*, 10973-10980.
11. *Molecular Operating Environment (MOE)*, 2012.10; Chemical Computing Group Inc.: 1010 Sherbooke St. West, Suite #910, Montreal, QC, Canada, H3A 2R7, 2012.
12. Halgren, T. A. MMFF VI. MMFF94s option for energy minimization studies. *J. Comput. Chem.* **1999**, *20*, 720-729.
13. Halgren, T. A. MMFF VII. Characterization of MMFF94, MMFF94s, and other widely available force fields for conformational energies and for intermolecular-interaction energies and geometries. *J. Comput. Chem.* **1999**, *20*, 740-774.
14. Bayly, C. I.; McKay, D.; Truchhon, J.-F. parm@frosst small molecule parameters compatible with AMBER. *Merck & Co. Internal Development Release* **2011**.
15. Jones, G.; Willet, P.; Glen, R. C.; Leach, A. R.; Taylor, R. Development And Validation of A Genetic Algorithm For Flexible Docking. *J. Mol. Biol.* **1997**, *267*, 727-748.
16. Verdonk, M. L.; Cole, J. C.; Hartshorn, M. J.; Murray, C. W.; Taylor, R. D. Improved Protein-Ligand Docking Using GOLD. *Proteins* **2003**, *52*, 609-623.
17. House, H. O.; Babad, H.; Toothill, R. B.; Noltes, A. W. The Stereochemical Effect of a Carboxyl Function on the Reduction of Ketones with Sodium Borohydride. *The Journal of Organic Chemistry* **1962**, *27*, 141-146.
18. Feichtinger, K.; Sings, H. L.; Baker, T. J.; Matthews, K.; Goodman, M. Triurethane-Protected Guanidines and Triflyldiurethane-Protected Guanidines: New Reagents for Guanidinylation Reactions. *Journal of Organic Chemistry* **1998**, *63*, 8432-8439.
19. Freire, E.; Kawasaki, Y.; Velazquez-Campoy, A.; and Schön, A. Characterization of Ligand Binding by Calorimetry. In: *RSC Biomolecular Sciences No. 22: Biophysical Approaches Determining Ligand Binding to Biomolecular Targets: Detection, Measurement and Modelling* (Podjarny, A., Dejaegere, A., and Kieffer, B Eds.) RSC Publishing; **2011**, 275 - 299.

---

<sup>1</sup> Procedure adapted from: Fülöp, F.; Palko, M.; Kaman, J.; Lazar, L.; Sillanpää, R. *Tetrahedron: Asymmetry* **2000**, *11*, 4179-4187. Spectra are consistent with literature report.

<sup>2</sup> Spectra consistent with literature report: Fülöp, F.; Forró, E.; Toth, M. K. *Organic Letters* **2004**, *6*, 4239-4241.

<sup>3</sup> Procedure adapted from: Forró, E.; Fülöp, F. *Chem. Eur. J.* **2006**, *12*, 2587. Spectra consistent with literature report.

<sup>4</sup> NMR Spectra were consistent with literature report: Murray, R. J.; Cromwell, N. H. *J. Heterocycl. Chem.* **1974**, *11*, 979.
